1 **Regulation of Plant Phototropic Growth by NPH3/RPT2-like Substrate**  
2 **Phosphorylation and 14-3-3 Binding**

3

4 Stuart Sullivan<sup>1\*</sup>, Thomas Waksman<sup>1</sup>, Louise Henderson<sup>1</sup>, Dimitra Paliogianni<sup>1</sup>,  
5 Melanie Lütkemeyer<sup>1,2</sup>, Noriyuki Suetsugu<sup>1,3</sup> and John M. Christie<sup>1\*</sup>

6

7 <sup>1</sup>Institute of Molecular, Cell and Systems Biology, College of Medical, Veterinary and  
8 Life Sciences, Bower Building, University of Glasgow, Glasgow G12 8QQ, UK

9 <sup>2</sup>RNA Biology and Molecular Physiology, Faculty of Biology, Bielefeld University,  
10 33615 Bielefeld, Germany

11 <sup>3</sup>Graduate School of Arts and Sciences, The University of Tokyo, Tokyo 153-8902,  
12 Japan

13 \*Corresponding Authors: John M. Christie; [John.Christie@glasgow.ac.uk](mailto:John.Christie@glasgow.ac.uk); Stuart  
14 Sullivan; [Stuart.Sullivan@glasgow.ac.uk](mailto:Stuart.Sullivan@glasgow.ac.uk)

15

16 Running title: Phot1 phosphorylation of NPH3

17

18 Keywords: 14-3-3, *Arabidopsis thaliana*, NPH3, phosphorylation, phototropin,  
19 phototropism

20

21 **Abstract / Summary**

22 Polarity underlies all plant physiology and directional growth responses such as  
23 phototropism. Yet, our understanding of how plant tropic responses are established is  
24 far from complete. The plasma-membrane associated BTB-containing protein, NON-  
25 PHOTOTROPIC HYPOCOTYL 3 (NPH3) is a key determinant of phototropic growth  
26 which is regulated by AGC kinases known as the phototropins (phot). However, the  
27 mechanism by which phototropins initiate phototropic signalling via NPH3, and other  
28 NPH3/RPT2-like (NRL) members, has remained unresolved. Here we demonstrate  
29 that NPH3 is directly phosphorylated by phot1 both *in vitro* and *in vivo*. Light-dependent  
30 phosphorylation within a conserved consensus sequence (RxS) located at the extreme  
31 C-terminus of NPH3 is necessary to promote its functionality for phototropism and  
32 petiole positioning in *Arabidopsis*. Phosphorylation of this region by phot1 also triggers  
33 14-3-3 binding combined with changes in NPH3 phosphorylation and localisation  
34 status. Seedlings expressing mutants of NPH3 that are unable to bind or constitutively  
35 bind 14-3-3s show compromised functionality that is consistent with a model where  
36 signalling outputs arising from a gradient in NPH3 RxS phosphorylation/localisation  
37 across the stem are a major contributor to phototropic responsiveness. Our current  
38 findings provide further evidence that 14-3-3 proteins are instrumental components  
39 regulating auxin-dependent growth and show for the first time that NRL proteins are  
40 direct phosphorylation targets for plant AGC kinases. Moreover, the C-terminal  
41 phosphorylation site/14-3-3-binding motif of NPH3 is conserved in several members of  
42 the NRL family, suggesting a common mechanism of regulation.

## 43 **Introduction**

44 The ability to sense and respond to the prevailing light conditions is instrumental for  
45 plants to adapt their growth and development to the external environment.  
46 Phototropism allows plants to re-orientate shoot growth towards a directional light  
47 source, which promotes light capture and early seedling growth (Christie and Murphy,  
48 2013). Phototropism is induced by UV/blue light and is mediated by two phototropin  
49 (phot) receptor kinases, phot1 and phot2 (Fankhauser and Christie, 2015). Phot1 is  
50 the primary phototropic receptor and functions over a wide range of fluence rates,  
51 whereas phot2 activity requires higher light intensities (Sakai et al., 2001). Phots also  
52 control physiological responses such as chloroplast movement, leaf positioning, leaf  
53 expansion and stomatal opening (Christie, 2007), which together serve to optimize  
54 photosynthetic efficiency and growth (Takemiya et al., 2005; Gotoh et al., 2018; Hart  
55 et al., 2019).

56 Phototropins are plasma membrane-associated kinases containing two light,  
57 oxygen, or voltage-sensing domains (LOV1 and LOV2) at their N-terminus, which bind  
58 oxidized flavin mononucleotide (FMN) as a UV/blue light absorbing cofactor (Christie  
59 et al., 1999; Sullivan et al., 2008). Light perception, primarily by LOV2, results in  
60 activation of phototropin kinase activity and receptor autophosphorylation (Christie et  
61 al., 2002; Cho et al., 2007). Although multiple phosphorylation sites have been  
62 identified within phot1 and phot2 (Christie et al., 2015), sites within the kinase  
63 activation loop are important for signalling, and kinase-inactive variants of phot1 and  
64 phot2 are non-functional (Inoue et al., 2008b; Inoue et al., 2011). Despite the  
65 importance of phot kinase activity for downstream signalling, only a limited number of  
66 substrates have been identified to date. BLUE LIGHT SIGNALING 1 (BLUS1) and  
67 CONVERGENCE OF BLUE LIGHT AND CO<sub>2</sub> 1 (CBC1) are phot1 kinase substrates  
68 involved in blue-light induced stomatal opening (Takemiya et al., 2013; Hiyama et al.,  
69 2017), while phosphorylation of ATP- BINDING CASSETTE B19 (ABCB19) and  
70 PHYTOCHROME KINASE SUBSTRATE 4 (PKS4) by phot1 modulates hypocotyl  
71 phototropism (Christie et al., 2011; Demarsy et al., 2012; Schumacher et al., 2018).  
72 Given the variety of physiological responses mediated by phot signalling, further phot  
73 kinase substrates likely await identification (Schnabel et al., 2018).

74 Phototropism results from the establishment of lateral gradients of the  
75 phytohormone auxin, which leads to increased cell expansion on the shaded side of  
76 the hypocotyl (Christie and Murphy, 2013). NON-PHOTOTROPIC HYPOCOTYL 3

77 (NPH3) is an essential signalling component for phototropism and is required for the  
78 formation of the lateral auxin gradients (Motchoulski and Liscum, 1999; Haga et al.,  
79 2005). NPH3, together with ROOT PHOTOTROPISM 2 (RPT2), are the founding  
80 members of the NPH3/RPT2-Like (NRL) protein family, which contains 33 members in  
81 *Arabidopsis* (Pedmale et al., 2010; Christie et al., 2018). The primary amino acid  
82 structure of NPH3 can be separated into three regions based on sequence  
83 conservation with other NRL proteins: an N-terminal BTB (bric-a-brac, tramtrack, and  
84 broad complex) domain, a central NPH3 domain and a C-terminal coiled-coil domain  
85 (Christie et al., 2018). The C-terminal portion of NPH3, including the coiled-coil domain,  
86 is proposed to facilitate localisation of NPH3 to the plasma membrane (Inoue et al.,  
87 2008a) as well as mediating direct interaction with phot1 (Motchoulski and Liscum,  
88 1999). NPH3 is reported to function as a substrate adapter in a CULLIN3-based E3  
89 ubiquitin ligase complex targeting phot1 for ubiquitination (Roberts et al., 2011).  
90 Ubiquitination of phot1 may be involved in receptor desensitisation, particularly under  
91 high light irradiation (Roberts et al., 2011), but its importance in phot1 signalling is  
92 currently unknown.

93         Although the biochemical function of NPH3 remains unresolved, activation of  
94 phot1 by blue light results in dynamic changes to NPH3 phosphorylation status and  
95 subcellular localisation (Haga et al., 2015; Sullivan et al., 2019). NPH3 is  
96 phosphorylated on multiple sites in darkness, including sites located towards the N-  
97 terminus (Tsuchida-Mayama et al., 2008), and localises to the plasma membrane  
98 (Haga et al., 2015). Upon blue light perception, NPH3 is rapidly dephosphorylated  
99 (Pedmale and Liscum, 2007) and becomes internalised into aggregates, which  
100 transiently attenuates its interaction with phot1 (Haga et al., 2015; Sullivan et al., 2019).  
101 These effects are reversible in darkness, with the kinetics of NPH3 rephosphorylation  
102 matching the photoactive lifetime of phot1 (Hart et al., 2019). The kinases and  
103 phosphatases which modulate NPH3 phosphorylation status are unknown, however  
104 reduced levels of dephosphorylation, and relocalisation into aggregates, correlates  
105 with enhanced phototropic responsiveness observed in de-etiolated (green) seedlings  
106 (Sullivan et al., 2019).

107         Along with NPH3, two other NRL family members also have known roles in phot  
108 signalling pathways. RPT2 interacts with both phot1 and NPH3 (Inada et al., 2004;  
109 Sullivan et al., 2009), it is proposed to influence NPH3 phosphorylation status and  
110 promote the reconstitution of the phot1-NPH3 complex to sustain signalling under



111 higher light intensities (Haga et al., 2015). In line with this, phototropic responsiveness  
112 in mutant seedlings lacking RPT2 decreases as light intensity is increased (Sakai et  
113 al., 2000). Similarly, *RPT2* expression levels are low in darkness, but increase with  
114 irradiation in a fluence-dependent manner (Sakai et al., 2000). RPT2, together with  
115 NPH3, is also involved in phot-mediated leaf positioning and leaf expansion responses  
116 (Inoue et al., 2008a; Harada et al., 2013). NRL PROTEIN FOR CHLOROPLAST  
117 MOVEMENT 1 (NCH1) is positioned within the same clade as RPT2 in the *Arabidopsis*  
118 NRL phylogenetic tree (Christie et al., 2018). NCH1 and RPT2 redundantly mediate  
119 chloroplast accumulation movements in response to low intensity light (Suetsugu et  
120 al., 2016).

121 Phot signalling is dependent upon reversible changes in phosphorylation  
122 (Christie et al., 2015). 14-3-3 proteins are present in all eukaryotic organisms and bind  
123 to target proteins through identification of phospho-serine/threonine motifs (Aitken et  
124 al., 1992; Johnson et al., 2010). 14-3-3 binding can produce a variety of consequences,  
125 such as regulation of enzymatic activity, changes in subcellular localisation, protein  
126 stability or alteration of protein-protein interactions (Camoni et al., 2018). 14-3-3  
127 proteins are known to bind to phot1 and phot2 following receptor autophosphorylation  
128 (Kinoshita et al., 2003; Inoue et al., 2008b; Sullivan et al., 2009; Tseng et al., 2012),  
129 while NPH3 and RPT2 have both been identified as components of the 14-3-3  
130 interactome (Schoonheim et al., 2007; Keicher et al., 2017). However, the functional  
131 relevance of these interactions and the roles of 14-3-3 proteins in phot signalling  
132 remain unclear.

133 Despite the importance of NRL proteins in blue-light mediated responses, how  
134 signalling is initiated upon phot activation is still not known. In the present study we  
135 identify NPH3 as a substrate for phot1 kinase activity. Phosphorylation of NPH3 at the  
136 C-terminus by phot1 results in 14-3-3 binding, which is required for early signalling  
137 events and promotes NPH3 functionality. The C-terminal phosphorylation site of NPH3  
138 is conserved in several NRL family members, including RPT2, suggesting phot-  
139 mediated phosphorylation and 14-3-3 binding may represent a conserved mechanism  
140 of regulation.

## 141 **Results**

142

### 143 **Light-dependent 14-3-3 binding to NPH3**

144 In order to identify additional components involved in blue light signalling, GFP-NPH3  
145 was immunoprecipitated from etiolated *nph3* mutant seedlings expressing functional  
146 *NPH3::GFP-NPH3* (Sullivan et al., 2019). Anti-GFP immunoprecipitations (IPs) were  
147 performed on total protein extracts from seedlings maintained in darkness or after a  
148 brief blue light treatment ( $20 \mu\text{mol m}^{-2} \text{s}^{-1}$  for 15 min) to capture early signalling events.  
149 Co-purifying proteins were analysed by label-free quantitative tandem mass  
150 spectrometry (MS) to allow identification of proteins whose abundance changed  
151 following blue light irradiation. As expected, *phot1* was recovered in the  
152 immunoprecipitations from both dark- and light-treated seedlings, but at a higher  
153 abundance in the dark (Table S1). This is in agreement with previous results showing  
154 NPH3-*phot1* interactions are attenuated by blue light (Haga et al., 2015). Conversely,  
155 several 14-3-3 isoforms were detected at greater abundance following blue light  
156 irradiation (Fig. 1A).

157 14-3-3 proteins bind to target proteins through recognition of phospho-  
158 serine/threonine containing motifs. *Arabidopsis* expresses 13 different 14-3-3 isoforms  
159 which can be phylogenetically divided into the epsilon and non-epsilon groups (DeLille  
160 et al., 2001). Far-western blotting was performed to assess direct 14-3-3 binding to  
161 GFP-NPH3. Binding of recombinant 14-3-3 Lambda (non-epsilon group member) and  
162 14-3-3 Epsilon (epsilon group member) fused to glutathione-S-transferase (GST) was  
163 not detected for GFP-NPH3 IPs from etiolated seedlings maintained in darkness (Fig.  
164 1B). Blue-light irradiation results in an enhanced electrophoretic mobility of GFP-NPH3  
165 due to its rapid dephosphorylation (Pedmale and Liscum, 2007). Concurrently, binding  
166 of 14-3-3 Lambda and Epsilon was observed following irradiation, while no binding was  
167 observed when GST alone was used as the probe. In line with the results from IP-MS  
168 analysis, no specificity in binding of 14-3-3 proteins from epsilon and non-epsilon  
169 groups was detected. These results suggest that blue light irradiation triggers both  
170 phosphorylation, and concomitant 14-3-3 binding, as well as dephosphorylation events  
171 on NPH3.

172

### 173 **Analysis of phosphorylation sites within NPH3**

174 Activation of phot1 by blue light results not only in rapid changes in the phosphorylation  
175 status of NPH3 but also its subcellular localisation (Haga et al., 2015; Sullivan et al.,  
176 2019). In darkness, NPH3 localises predominantly to the plasma membrane but is  
177 rapidly internalised into aggregates upon blue-light treatment. Based on data from  
178 global phosphoproteomics experiments (Durek et al., 2010; Willems et al., 2019) three  
179 regions of NPH3 (M1, M2 and M3) containing the majority of experimentally identified  
180 phosphopeptides were selected for mutational analysis (Fig. 2A). Within each of the  
181 regions, all of the serine and threonine residues were replaced with alanine to mimic  
182 the dephosphorylated state. The mutations were introduced into the *NPH3::GFP-*  
183 *NPH3* construct, transiently expressed in the leaves of *Nicotiana benthamiana* and  
184 compared with the expression of the non-mutated GFP-NPH3 control. Transfected *N.*  
185 *benthamiana* plants were dark-adapted before confocal observation. The localisation  
186 of transiently expressed GFP-NPH3 was similar to that of functionally active GFP-  
187 NPH3 in *Arabidopsis* (Sullivan et al., 2019) described above, and repeated scanning  
188 with the 488-nm laser used to concomitantly excite GFP along with endogenous phot1  
189 induced relocalisation of GFP-NPH3 into aggregates (Fig. 2B). The localisation of each  
190 of the transiently expressed NPH3 phospho-mutants was the same as GFP-NPH3  
191 when imaged immediately (scan 1). Repeated laser scanning was effective in inducing  
192 relocalisation for both M1 and M2 constructs, whereas the M3 mutant failed to show  
193 any light-induced changes in subcellular localisation.

194 Phot1-induced changes in NPH3 localisation are correlated with changes in  
195 NPH3 phosphorylation status in transgenic *Arabidopsis* seedlings (Haga et al., 2015;  
196 Sullivan et al., 2019). Immunoblot analysis of protein extracts from dark-adapted  
197 leaves of *N. benthamiana* transiently expressing GFP-NPH3 irradiated with blue light  
198 also showed an enhanced electrophoretic mobility compared to leaves maintained in  
199 darkness (Fig. 2C), although to a lesser degree than observed in etiolated *Arabidopsis*  
200 seedlings expressing GFP-NPH3 when equivalent light treatments were used (Fig.  
201 1B). Both the M1 and M3 mutants were affected for this response, whereas the M2  
202 mutant response was similar to GFP-NPH3 (Fig. 2C). The M1 mutant showed  
203 enhanced electrophoretic mobility in the dark compared to the GFP-NPH3 construct,  
204 with a further slight enhancement following blue light treatment. The M1 mutant  
205 contains mutations of serine residues S213, S223, S233 and S237, mutation of which  
206 was previously shown to contribute to reducing the electrophoretic mobility of NPH3 in  
207 darkness (Tsuchida-Mayama et al., 2008). Conversely, the M3 mutant migrated at the

208 same position as GFP-NPH3 in the dark, even following blue light irradiation.  
209 Therefore, amino acid residues within the M3 region at the C-terminus of NPH3 are  
210 required for both relocalisation and dephosphorylation in response to blue light.

211 The C-terminal amino acid sequence of NPH3 is highly conserved in  
212 angiosperms (Fig. S1A) and contains two serine residues, S744 and S746 in  
213 *Arabidopsis* NPH3. Mutation of either serine residue to alanine, singularly or together,  
214 prevented (for S744A and S744A S746A) or greatly reduced (for S746A) the light-  
215 induced relocalisation response when transiently expressed in *N. benthamiana* (Fig.  
216 2D). Similarly, these mutations also prevented dephosphorylation of NPH3 following  
217 blue light irradiation (Fig. 2E). Therefore, mutation of S744 and/or S746 can reproduce  
218 the results obtained with the M3 mutant. While serine to alanine mutations effectively  
219 block phosphorylation of the respective residue, phosphomimetic substitutions aim to  
220 mimic the phosphorylated state by replacement with a negatively charged amino acid.  
221 However, mutation of S744 and S746 to aspartate produced similar results to the  
222 alanine mutations; loss of light-induced relocalisation and dephosphorylation (Fig.  
223 S1B, Fig. S1C).

224

### 225 **S744 is required for 14-3-3 binding and early signalling events**

226 To examine the effects of the C-terminal serine residues S744 and S746 in NPH3  
227 signalling, we generated transgenic *Arabidopsis* expressing *NPH3::GFP-NPH3*  
228 containing S744A S746A, S744D S746D, S744A or S746A mutations in the *nph3*  
229 mutant background. Confocal imaging of hypocotyl cells of etiolated seedlings  
230 expressing S744A S746A or S744D S746D showed that both mutants did not  
231 relocalise into aggregates following irradiation with the 488nm laser, in contrast to the  
232 GFP-NPH3 control (Fig. 3A). The single S744A mutant also lacked this response,  
233 whereas the S746A mutant was unaffected. Furthermore, analysis of NPH3  
234 dephosphorylation showed that seedlings expressing S744A S746A, S744D S746D or  
235 S744A exhibited no change in electrophoretic mobility with blue light treatment, in  
236 contrast to S746A and GFP-NPH3 expressing lines, which both displayed an  
237 enhanced mobility with blue light treatment (Fig. 3B). Whereas results from transient  
238 expression analysis in *N. benthamiana* showed both S744 and S746 were involved in  
239 these early signalling responses (Fig. 2D, Fig. 2E), analysis of transgenic *Arabidopsis*  
240 identifies only S744 as being required.

241 To determine whether S744 was also required to mediate interactions between  
242 NPH3 and 14-3-3 proteins, far-western blotting was performed on anti-GFP IPs from  
243 seedlings expressing GFP-NPH3 or GFP-NPH3 containing S744A or S746A mutations  
244 (Fig. 3C). Binding of recombinant 14-3-3 Epsilon was evident for both GFP-NPH3 and  
245 S746A in a light-dependent manner, with the signal for S746A being substantially  
246 lower. However, no binding could be detected for the S744A mutant. Phosphorylation  
247 of S744 is therefore necessary for 14-3-3 binding, subcellular relocalisation and  
248 dephosphorylation of N-terminal sites (including S213, S223, S233 and S237) in  
249 response to blue light perception.

250

### 251 **Phot1 phosphorylates NPH3 at position S744 in a light-dependent manner**

252 Given the evidence for light-induced phosphorylation of NPH3, we examined whether  
253 NPH3 was a direct substrate for phot1 kinase activity using a gate-keeper engineered  
254 phot1 (phot1<sup>GK</sup>), that can accommodate the bulky ATP analogue N<sup>6</sup>-benzyl-ATP<sub>γ</sub>S as  
255 a thiophospho-donor (Schnabel et al., 2018). NPH3, or the NPH3 S744A mutant, were  
256 co-expressed in a cell-free expression system with phot1<sup>GK</sup> and used for *in vitro* kinase  
257 assays in the presence of N<sup>6</sup>-benzyl-ATP<sub>γ</sub>S. Light-induced thiophosphorylation, which  
258 can be detected by immunoblotting with anti-thiophosphoester antibody (α-TPE)  
259 following chemical alkylation of the incorporated thiophosphates, was detected for  
260 NPH3 but not for the S744A mutant (Fig. 4A), showing phot1 can specifically  
261 phosphorylate residue S744 of NPH3 *in vitro*. To detect the phosphorylation status of  
262 S744 *in vivo* we raised a phospho-specific antibody (pS744). Phosphorylation of S744  
263 was observed in WT and GFP-NPH3 expressing seedlings in a light-dependent  
264 manner and mutation of S774 resulted in a loss of signal demonstrating the specificity  
265 of the pS744 phospho-specific antibody (Fig. 4B). Phosphorylation of S744 was also  
266 detectable for S746A expressing seedlings at a reduced level, similar to the results  
267 observed for 14-3-3 binding (Fig. 3C).

268 Phot1 is the main photoreceptor mediating phototropism to low (<1 μmol m<sup>-2</sup> s<sup>-1</sup>)  
269 and high (>1 μmol m<sup>-2</sup> s<sup>-1</sup>) fluence rates of blue light, whereas phot2 functions  
270 predominantly at higher light intensities (>10 μmol m<sup>-2</sup> s<sup>-1</sup>; Sakai et al., 2001).  
271 Phosphorylation of S744 occurred in WT seedlings in response to both low blue (0.5  
272 μmol m<sup>-2</sup> s<sup>-1</sup>) and high blue (50 μmol m<sup>-2</sup> s<sup>-1</sup>) light treatments concomitantly with NPH3  
273 dephosphorylation, detected via changes in electrophoretic mobility when probed with

274 anti-NPH3 antibody (Fig. 4C). These responses were absent in *phot1 phot2* double  
275 mutant and *phot1* single mutant seedlings, but unchanged in the *phot2* single mutant,  
276 demonstrating that phosphorylation of S744 and dephosphorylation of NPH3 are  
277 *phot1*-specific responses in etiolated seedlings.

278 To assess the kinetics of changes in NPH3 phosphorylation status we  
279 performed time-course experiments. Complete dephosphorylation of NPH3 required  
280 15 min of blue light irradiation (Fig. 5A), whereas phosphorylation of S744 was  
281 detected within 30 s and maintained over the 2 h irradiation period. When etiolated  
282 seedlings were returned to darkness following blue light exposure, S744 was  
283 dephosphorylated within 15 min, matching the time required for rephosphorylation of  
284 sites responsible for the electrophoretic mobility shift (Fig. 5B). Therefore, *phot1*  
285 phosphorylation of S744 is rapid, occurring before light-induced dephosphorylation,  
286 and reversible in darkness.

287

### 288 **Phot1 phosphorylation of NPH3 promotes functionality**

289 *Arabidopsis* mutants lacking NPH3 fail to exhibit hypocotyl phototropism under a  
290 variety of different light conditions (Liscum and Briggs, 1996; Sakai et al., 2000).  
291 Phototropism in two independent homozygous transgenic *nph3* mutants expressing  
292 *NPH3::GFP-NPH3* is restored to levels comparable to non-transgenic WT seedlings  
293 when irradiated with  $0.5 \mu\text{mol m}^{-2} \text{s}^{-1}$  of unilateral blue light (Fig. 6A). In contrast, the  
294 magnitude and kinetics of phototropic curvature was reduced in seedlings expressing  
295 GFP-NPH3 with both S744 and S746 residues mutated to alanine or aspartate (Fig.  
296 6A). Similarly, phototropism was reduced in seedlings expressing GFP-NPH3  
297 containing the S744A mutant, while the S746A expressing seedlings were fully  
298 functional (Fig. 6B). To determine whether the reduced phototropic responsiveness of  
299 the S744A mutant is due to altered photosensitivity, phototropism was further  
300 assessed under lower ( $0.05 \mu\text{mol m}^{-2} \text{s}^{-1}$ ; Fig. 6C) and higher ( $20 \mu\text{mol m}^{-2} \text{s}^{-1}$ ; Fig. 6D)  
301 intensity blue light irradiation. Under both fluence rates, transgenic lines expressing  
302 the S744A mutant were less responsive than the GFP-NPH3 or S746A expressing  
303 lines.

304 NPH3 also functions in phototropin-mediated leaf positioning, particularly in low  
305 light environments (Inoue et al., 2008a). In WT seedlings transferred to low intensity  
306 white light ( $10 \mu\text{mol m}^{-2} \text{s}^{-1}$ ) the petioles of the first true leaves were positioned obliquely  
307 upwards in order to maximise light capture, while the petioles of *nph3* mutant seedlings



308 were positioned horizontally (Fig. 6E). Seedlings expressing GFP-NPH3 or the S746A  
309 mutant were complemented for petiole positioning, while the response of seedlings  
310 expressing the S744A mutant was significantly reduced (Fig. 6E), which was also  
311 observed for the S744A S746A and S744D S746D transgenic lines (Fig. S2). These  
312 results demonstrate that phot1 phosphorylation of S744 positively regulates NPH3  
313 function.

314

### 315 **Phosphorylation and 14-3-3 binding drives NPH3 relocalisation**

316 The phenotypes of seedlings expressing GFP-NPH3 containing S744D S746D  
317 mutations were identical to seedlings expressing NPH3 with the S744A S746A  
318 mutations (Fig. 3, Fig. 6A), consistent with reports that aspartate does not effectively  
319 mimic phosphorylation with respect to 14-3-3 binding (Maudoux et al., 2000; Johnson  
320 et al., 2010). To create a constitutively 14-3-3 binding variant, the sequence encoding  
321 the last three amino acids of the *NPH3::GFP-NPH3* construct, including the S744  
322 phosphorylation site, was replaced with the R18 peptide sequence (Fig. 7A). R18 is a  
323 synthetic peptide that mediates phosphorylation-independent binding of 14-3-3  
324 proteins with high affinity (Wang et al., 1999). As a control, a construct containing a  
325 mutated version of the R18 sequence (mR18), known to abolish 14-3-3 binding (Ramm  
326 et al., 2006), was also generated (Fig. 7A). When transiently expressed in *N.*  
327 *benthamiana*, GFP-NPH3-R18 appeared as aggregates when dark-adapted leaves  
328 were imaged immediately, with no change in localisation during imaging (Fig. 7B).  
329 Conversely, GFP-NPH3-mR18 remained localised to the plasma membrane following  
330 repeated laser scanning, as previously observed with GFP-NPH3 constructs lacking  
331 the S744 phosphorylation site (Fig. 2D, Fig. S1B).

332 To confirm these results in stable transgenic lines, *Arabidopsis nph3* mutants  
333 were transformed with *NPH3::GFP-NPH3* containing the R18 or mR18 sequences.  
334 Confocal imaging of hypocotyl cells of etiolated seedlings revealed similar patterns of  
335 localisation observed in *N. benthamiana*, with GFP-NPH3-R18 forming aggregates in  
336 darkness, whereas GFP-NPH3-mR18 failed to relocalise following repeated laser  
337 scanning (Fig. 7C). Consistent with the subcellular localisation patterns, analysis of  
338 NPH3 dephosphorylation showed that lines expressing GFP-NPH3-mR18 display no  
339 change in electrophoretic mobility following blue light treatment, while a portion of GFP-  
340 NPH3-R18 exhibited enhanced electrophoretic mobility both in darkness and after  
341 irradiation (Fig. 7D). Far-western blotting was used to confirm the constitutive binding



342 of recombinant 14-3-3 Epsilon to GFP-NPH3-R18 immunoprecipitated from seedlings  
343 maintained in darkness and following blue light irradiation, as well as the absence of  
344 14-3-3 binding to GFP-NPH3-mR18 (Fig. 7E). Together these results show that  
345 engineered 14-3-3 binding, independent from phot1-mediated S744 phosphorylation,  
346 is partially sufficient to induce changes in NPH3 dephosphorylation and localisation  
347 status.

348 To assess functionality, phototropism was measured in GFP-NPH3-R18 and  
349 GFP-NPH3-mR18 expressing seedlings irradiated with  $0.05 \mu\text{mol m}^{-2} \text{s}^{-1}$ ,  $0.5 \mu\text{mol m}^{-2}$   
350  $\text{s}^{-1}$  or  $20 \mu\text{mol m}^{-2} \text{s}^{-1}$  of unilateral blue light. Phototropic responsiveness was reduced  
351 under all fluence rates for GFP-NPH3-mR18 expressing seedlings (Fig. 7G, Fig. S3B),  
352 matching the phenotype of seedlings expressing GFP-NPH3 containing the S744A  
353 mutation (Fig. 6B – D). Phototropism was further reduced in seedlings expressing  
354 GFP-NPH3-R18 (Fig. 7F, Fig. S3A), which also displayed an increased variability in  
355 the direction of curvature (Fig. S3C) compared to the GFP-NPH3-mR18 lines.  
356 Therefore, while NPH3 mutants unable to bind 14-3-3 proteins have a reduced ability  
357 to reorientate growth towards a light source, constitutively 14-3-3 bound NPH3 mutants  
358 also display a diminished ability to sense the directionality of a light source.

## 359 Discussion

360 In this study we used mass spectrometry to identify proteins co-immunoprecipitating  
361 with GFP-NPH3. This revealed 14-3-3 proteins as NPH3 interactors specifically  
362 following a blue-light treatment (Fig. 1). Using a chemical-genetic approach, we have  
363 found that NPH3 is phosphorylated by phot1 on the C-terminally positioned S744 in a  
364 light-dependent manner (Fig. 4A). Moreover, generation of anti-pS744 antibodies  
365 confirmed light-induced phosphorylation of S744 *in vivo* (Fig. 4C). Phototropins are  
366 members of the AGCVIII (protein kinase A, cyclic GMP-dependent protein kinase and  
367 protein kinase C) subfamily of protein kinases (Barbosa and Schwechheimer, 2014)  
368 and S744 is part of a PKA-like phosphorylation consensus sequence (RxS), as are the  
369 previously identified phot1-kinase substrates BLUS1 (Takemiya et al., 2013), CBC1  
370 (Hiyama et al., 2017) and PKS4 (Schumacher et al., 2018); Fig. S4A).

371 Phot1-mediated phosphorylation of S744 is required to elicit the previously  
372 documented early cellular events associated with NPH3 activation such as  
373 dephosphorylation (Pedmale and Liscum, 2007) and subcellular relocalisation (Haga  
374 et al., 2015; Sullivan et al., 2019). This is consistent with previous observations of  
375 changes in NPH3 electrophoretic mobility correlating with the lifetime duration of phot1  
376 activation *in planta* (Hart et al., 2019) and occurring locally only in cells/tissues where  
377 both proteins are present (Sullivan et al., 2016). Furthermore, a constitutively active  
378 phot1-variant can induce NPH3 dephosphorylation in darkness (Kimura et al., 2020).  
379 The phosphorylation status of residues S213, S223, S233 and S237 contribute to  
380 reducing the electrophoretic mobility of NPH3 in darkness (Tsuchida-Mayama et al.,  
381 2008), however other unidentified sites are also involved (Fig. 2C; (Haga et al., 2015)).  
382 The kinase(s) and phosphatase(s) regulating the phosphorylation status of these sites  
383 is currently unknown, as is their role in regulating NPH3 signalling. However, mutation  
384 of S213, S223, S233 and S237 to alanine, or deletion of amino acid residues S213-  
385 S239, did not impact their ability to restore phototropism in *nph3* mutant seedlings  
386 (Tsuchida-Mayama et al., 2008), or form aggregates when transiently expressed in *N.*  
387 *benthamiana* (Fig. 2B).

388 Phosphorylation of S744 creates a 14-3-3 binding site (Fig. 3C) which conforms  
389 to the C-terminal mode III 14-3-3 binding motif pS/pTX<sub>1-2</sub>-COOH (Camoni et al., 2018).  
390 We created a translational fusion between NPH3 and the synthetic R18 peptide to  
391 study the role of 14-3-3 binding in the absence of phot1 phosphorylation (Fig. 7E). 14-  
392 3-3 binding alone was able to induce NPH3 relocalisation into aggregates (Fig. 7B,

393 Fig. 7C) and partially reduce the electrophoretic mobility of NPH3 (Fig. 7D), in the  
394 absence or presence of light. Light-dependent 14-3-3 binding has also been shown for  
395 phot1; non-epsilon 14-3-3s bind to 3 phosphorylation sites located between the LOV1  
396 and LOV2 photosensory domains (Sullivan et al., 2009), but the functional relevance  
397 of this interaction is unknown as mutation of 2 of the phosphorylation sites did not  
398 impair functionality (Inoue et al., 2008a). In contrast, no isoform specificity was  
399 observed for 14-3-3 binding to NPH3, with both epsilon and non-epsilon isoforms  
400 shown to interact (Fig. 1). Functional redundancy between 14-3-3 isoforms means  
401 loss-of-function mutants often show few, if any, phenotypes, with even quadruple non-  
402 epsilon 14-3-3 mutants displaying mild growth phenotypes under non-stress growth  
403 conditions (van Kleeff et al., 2014), with no obvious differences in phototropism or  
404 NPH3 dephosphorylation kinetics observed compared to WT seedlings (Fig. S5).  
405 However, conditional RNA interference (RNAi) lines targeting three 14-3-3 epsilon  
406 members (epsilon, mu and omicron) displayed several auxin-related phenotypes,  
407 including reduced hypocotyl elongation and defects in root and hypocotyl gravitropism,  
408 due to altered polarity of the PIN-FORMED (PIN) auxin transporters as a consequence  
409 of 14-3-3 regulation of cellular trafficking (Keicher et al., 2017). NPH3 is also reported  
410 to be required for phot1-driven changes in PIN2 trafficking during negative phototropic  
411 bending of roots (Wan et al., 2012). However, the role of asymmetric auxin distribution  
412 in root phototropism has recently been questioned (Kimura et al., 2018).

413 The biochemical basis underpinning phototropism is the formation of a gradient  
414 of phot1 activation across the stem (Salomon et al., 1997), which results in an  
415 asymmetric accumulation of auxin on the shaded side through an unidentified  
416 mechanism (Fankhauser and Christie, 2015). We previously demonstrated that a  
417 gradient of GFP-NPH3 relocalisation occurs across the hypocotyl of *Arabidopsis*  
418 seedlings during unilateral irradiation with blue light (Sullivan et al., 2019). Here we  
419 report that seedlings expressing mutants of GFP-NPH3 unable to form such a gradient,  
420 either through mutation of the phosphorylation site required for 14-3-3 binding (S744)  
421 or due to constitutive 14-3-3 binding via the R18 peptide, have a severely compromised  
422 phototropic response. Thus, phototropic curvature likely involves signalling outputs  
423 mediated by a gradient in NPH3 localisation across the stem. Our current findings are  
424 therefore consistent with 14-3-3 proteins being instrumental components regulating  
425 auxin-dependent growth (Keicher et al., 2017).

426           The phot1 phosphorylation consensus sequence of NPH3 is also conserved in  
427 several other NRL proteins including RPT2, NCH1 and members of the NAKED PINS  
428 IN YUCCA (NPY) clade (Fig. S4B). Notably, RPT2 was identified in  
429 immunoprecipitants of seedlings expressing 14-3-3 epsilon-GFP (Keicher et al., 2017).  
430 We could also detect phosphorylation of RPT2 on the corresponding serine residue  
431 (S591) when co-expressed with phot1<sup>GK</sup> in *in vitro* kinase assays (Fig. S4C). It is  
432 therefore possible the residual functionality seen in GFP-NPH3 S744A seedlings (Fig.  
433 6) arises from co-action with other NRL family members. However dynamic  
434 relocalisation in response to blue light has not been reported for RPT2 (Haga et al.,  
435 2015; Kimura et al., 2020) or NCH1 (Suetsugu et al., 2016), hence the consequences  
436 of phosphorylation and 14-3-3 binding must differ for specific NRL family members.  
437 The NPY clade of NRL proteins function redundantly to mediate organogenesis and  
438 root gravitropism (Furutani et al., 2007; Furutani et al., 2011; Li et al., 2011). These  
439 responses are independent of phototropin signalling but involve related AGCVIII  
440 kinases PINOID (PID) and its close homologues WAG1 and WAG2, and the D6  
441 PROTEIN KINASE (D6PK) family (Glanc et al., 2021). PID/WAGs and D6PKs  
442 phosphorylate PIN transporters on RxS phosphorylation site motifs (Barbosa and  
443 Schwechheimer, 2014) and physically interact with NPY proteins (Glanc et al., 2021).  
444 Furthermore, aggregate formation is not limited to NPH3 and has been documented  
445 for NPY1 when expressed in *Arabidopsis* protoplasts (Furutani et al., 2007). Therefore,  
446 phosphorylation and concomitant 14-3-3 binding to the C-terminus may represent a  
447 conserved mechanism of regulation for NRL proteins.

448           Determining the biochemical function of NPH3 is now required to understand  
449 how phototropin signal via NRL proteins to coordinate different light-capturing processes in  
450 plants that will ultimately offer new opportunities to manipulate plant growth through  
451 alterations in photosynthetic capacity.

## 452 **METHODS**

453

### 454 **Plant Material and growth**

455 Wild-type *Arabidopsis* (*gl-1*, ecotype Columbia), *nph3-6* (Motchoulski and Liscum,  
456 1999), 14-3-3 quadruple mutants (van Kleeff et al., 2014) and the GFP-NPH3  
457 transgenic line (Sullivan et al., 2019) were previously described. Unless otherwise  
458 stated, seeds were sown on soil or surface sterilised and planted on half-strength  
459 Murashige and Skoog (MS) medium with 0.8% agar (w/v) and stratified at 4°C for 2 -  
460 5 d. Seeds on soil were transferred to a controlled environment room (Fitotron, Weiss  
461 Technik) with LED illumination (C65NS12, Valoya) under 16 h 22 °C/ 8 h 18 °C light:  
462 dark cycles and 80  $\mu\text{mol m}^{-2} \text{s}^{-1}$  white light. Seeds on MS medium were exposed to 80  
463  $\mu\text{mol m}^{-2} \text{s}^{-1}$  white light for 6 to 8 h to induce germination and grown vertically in  
464 darkness for 3 d. For blue light treatment, white light was filtered through Moonlight  
465 Blue filter No. 183 (Lee Filters). Fluence rates for all light sources were measured with  
466 an Li-250A and quantum sensor (LI-COR).

467

### 468 **Transient Expression in *Nicotiana benthamiana***

469 To create transformation vectors encoding *NPH3* with multiple serine and threonine  
470 residues mutated to alanine, fragments of *NPH3* were synthesised (ThermoFisher  
471 Scientific) encoding the 13 alanine substitutions for *NPH3-M1*, 8 substitutions for  
472 *NPH3-M2* and 15 substitutions for *NPH3-M3*. The synthesised fragments were  
473 introduced into *NPH3::GFP-NPH3* using *KpnI* and *MluI* restriction sites for *GFP-NPH3-*  
474 *M1*, *MluI* and *PstI* restriction sites for *GFP-NPH3-M2* and *PstI* and *BamHI* restriction  
475 sites for *GFP-NPH3-M3*. *Agrobacterium*-mediated transient expression in *Nicotiana*  
476 *benthamiana* was performed as previously described (Kaiserli et al., 2009).  
477 *Agrobacterium tumefaciens* strain GV3101, transformed with the plasmid of interest,  
478 was resuspended in infiltration buffer (10 mM  $\text{MgCl}_2$ , 10 mM MES-KOH [pH 5.6], and  
479 200 mM acetosyringone) at an  $\text{OD}_{600}$  of 0.4 and syringe-infiltrated into leaves of 3 to  
480 4-week-old *N. benthamiana* plants. Plants were dark-adapted for 16 h before 1 cm leaf  
481 discs for confocal observation or protein extraction were taken 2 d post-infiltration. For  
482 blue-light irradiation, leaf discs were placed abaxial-side upwards on the surface of MS  
483 medium agar plates for the duration of the treatment.

484

### 485 **Transformation of *Arabidopsis***

486 Amino acid substitutions of S744 and/or S746 were introduced into the pUC-SP vector  
487 containing the *NPH3* coding sequence by site-directed mutagenesis and verified by  
488 DNA sequencing. The coding sequence of *NPH3* in the *NPH3::GFP-NPH3* pEZR(K)-  
489 LC binary vector (Sullivan et al., 2019) was replaced by the coding sequences  
490 containing the phosphosite mutations using Gibson Assembly (New England Biolabs).  
491 To create transformation vectors *NPH3::GFP-NPH3-R18* and *NPH3::GFP-NPH3-*  
492 *mR18*, a fragment encoding amino acid residues 419 – 743 was PCR amplified from  
493 *NPH3* pUC-SP with primers containing the R18 or mR18 coding sequence and  
494 inserted into *NPH3::GFP-NPH3* using *MluI* and *BamHI* restriction sites. The *nph3-6*  
495 mutant was transformed with *Agrobacterium tumefaciens* strain GV3101 as previously  
496 described (Davis et al., 2009). Based on the segregation of kanamycin resistance  
497 independent homozygous T3 lines, or for GFP-NPH3-mR18 transgenics single-  
498 insertion T2 lines, were selected for analysis.

499

### 500 **Phototropism**

501 Phototropism was performed using free-standing etiolated seedlings grown on a layer  
502 of silicon dioxide (Honeywell, Fluka), watered with quarter-strength MS medium, as  
503 previously described (Sullivan et al., 2016). Images were recorded every 10 min for 4  
504 h with a Retiga 6000 CCD camera (QImaging) connected to a personal computer  
505 running QCapture Pro 7 software (QImaging) with supplemental infrared illumination.  
506 Hypocotyl curvature was measured using Fiji software (Schindelin et al., 2012).  
507 Circular histograms were produced using Oriana software (Kovach Computing  
508 Services).

509

### 510 **Leaf positioning**

511 Seedlings were grown on soil for 9 d under  $80 \mu\text{mol m}^{-2} \text{s}^{-1}$  white light before transfer  
512 to  $10 \mu\text{mol m}^{-2} \text{s}^{-1}$  white light for 4 d. One cotyledon was removed, seedlings were  
513 placed flat on an agar plate, and plates were placed on a white light transilluminator  
514 and photographed. Petiole angles from the horizontal were measured using Fiji  
515 software.

516

### 517 **Confocal Microscopy**

518 Localization of GFP-tagged NPH3 was visualized with a Leica SP8 laser scanning  
519 confocal microscope using HC PL APO 20x/0.75 or 40x/1.30 objective. The 488-nm



520 excitation line was used, and GFP fluorescence was collected between 500 and 530  
521 nm. Images were acquired at 1,024-1,024-pixel resolution with a line average of two.  
522 Z-stacks were acquired at 5 min intervals, with darkness between each scan.  
523 Maximum projection images were constructed from z-stacks using Fiji software.

524

### 525 **Immunoblot Analysis**

526 Total proteins were extracted by grinding 50 3-d-old etiolated *Arabidopsis* seedlings or  
527 1 cm *Agrobacterium*-infiltrated *N. benthamiana* leaf discs in 100 µl 2 X SDS sample  
528 buffer under red safe light illumination, clarified by centrifugation at 13 000 g for 5 min,  
529 boiled for 4 min and subjected to SDS-PAGE. Proteins were transferred onto a  
530 polyvinylidene fluoride membrane (PVDF; Bio-Rad) with a Trans-Blot Turbo Transfer  
531 System (Bio-Rad) and detected with anti-GST monoclonal antibody (Merck), anti-GFP-  
532 HFP monoclonal antibody (Miltenyi Biotech), anti-thiophosphoester monoclonal  
533 antibody (clone 51-8, Abcam), anti-UGPase antibody (AgriSera), anti-phot1 polyclonal  
534 antibodies (Cho et al., 2007), anti-NPH3 purified polyclonal antibodies raised against  
535 peptides IPNRKTLIEATPQSF and GVDHPPPRKPRRWRN (Eurogentec) and  
536 polyclonal antibodies raised against phosphorylated S744 of NPH3 using peptide  
537 KPRRWRNpSIS (where pS represents phosphorylated serine) as antigen  
538 (Eurogentec). Blots were developed with horseradish peroxidase (HRP)-linked  
539 secondary antibodies (Promega) and Immobilon Western Chemiluminescent HRP  
540 Substrate (Merck).

541

### 542 **Far-Western Blot Analysis**

543 *Arabidopsis* 14-3-3 isoforms Epsilon and Lambda were expressed using the pGEX-  
544 4T1 vector (Merck), as a translational fusion with glutathione-S-transferase (GST) and  
545 purified with GST-Bind resin (Merck), as previously described (Sullivan et al., 2009).  
546 Total protein extracts were prepared from 3-d-old etiolated seedlings maintained in  
547 darkness, or following blue-light irradiation, under a dim red safe light. Seedlings were  
548 ground in a mortar and pestle in GTEN buffer (10% [v/v] glycerol, 25 mM Tris-HCl [pH  
549 7.5], 1 mM EDTA, 150 mM NaCl) supplemented with 0.5% SDS, 10 mM DTT, 1 mM  
550 phenylmethylsulfonyl fluoride (PMSF) and a protease inhibitor mixture (Complete  
551 EDTA-free; Merck) on ice and clarified by centrifugation at 10 000 g, 4 °C for 10 min.  
552 Immunoprecipitations were preformed using GFP-Trap Agarose beads (Chromotek),  
553 eluted by boiling in 2 X SDS sample buffer, separated by SDS-PAGE and transferred



554 to PVDF membrane. PVDF membranes were incubated with purified GST-14-3-3  
555 proteins or GST alone in far-western buffer (20 mM HEPES-KOH [pH 7.7], 75 mM KCl,  
556 0.1 mM EDTA, 1 mM DTT, 2% milk, 0.04% Tween-20) at a final concentration of 1  $\mu$ M.  
557 14-3-3 binding was detected using anti-GST monoclonal antibody (Merck).

558

### 559 **Immunoprecipitation**

560 Total protein extracts were prepared from 3-d-old etiolated WT seedlings or seedlings  
561 expressing GFP-NPH3 maintained in darkness (Dark) or irradiated with 20  $\mu$ mol m<sup>-2</sup> s<sup>-1</sup>  
562 of blue light for 15 min. Seedlings were ground in a mortar and pestle in IP buffer (50  
563 mM Tris-HCl [pH 7.5], 150 mM NaCl, 1 mM EDTA, 1% Triton X-100, 1 mM PMSF)  
564 supplemented with protease inhibitor mixture (Complete EDTA-free; Merck) and half-  
565 strength phosphatase inhibitor cocktail 2 and 3 (Merck). Samples were clarified twice  
566 by centrifugation at 14 000 g, 4 °C for 10 min. Immunoprecipitations were performed  
567 using the  $\mu$ MACS GFP isolation kit (Miltenyi Biotec), eluted with 0.1 M Triethylamine  
568 pH 11.8/0.1% Triton X-100 and neutralized with 1 M MES pH 3. Proteins were  
569 identified by liquid chromatography–tandem mass spectrometry using the Fingerprints  
570 Proteomics Facility (University of Dundee). Only proteins identified in 2 biological  
571 replicates from at least 2 peptides were retained for analysis. Proteins identified in  
572 immunoprecipitations from WT seedlings were considered contaminants. Protein  
573 intensities were converted to relative abundance of the bait protein (GFP-NPH3), which  
574 was set to 100 in each sample. Proteins showing at least a two-fold change in relative  
575 abundance following blue-light irradiation were identified (Table S1).

576

### 577 ***In vitro* kinase assay**

578 The coding sequence of *NPH3* in *NPH3::GFP-NPH3* and *NPH3::GFP-NPH3 S744A*  
579 was amplified and inserted into the pSP64 poly(A) vector (Promega), together with a  
580 N-terminal Haemagglutinin (HA) tag, using Gibson Assembly (New England Biolabs).  
581 The *RPT2* coding sequence was amplified and inserted into the pSP64 poly(A) vector,  
582 together with a N-terminal GST tag, using Gibson Assembly (New England Biolabs).  
583 The RPT2 S591A substitution was introduced by site-directed mutagenesis. *In vitro*  
584 kinase assays were performed by co-expressing the substrate together with a gate-  
585 keeper engineered phot1 (phot1<sup>GK</sup>) using the TnT® SP6 High-Yield Wheat Germ  
586 Protein Expression System (Promega) in the presence of 10  $\mu$ M FMN, as previously  
587 described (Schnabel et al., 2018). Thiophosphorylation reactions were performed in

588 the presence of 500  $\mu\text{M}$  N<sup>6</sup>-benzyl-ATPyS (Jena Bioscience), in phosphorylation buffer  
589 contained 37.5 mM Tris-HCl pH 7.5, 5.3 mM MgSO<sub>4</sub>, 150 mM NaCl and 1 mM EGTA.  
590 Samples were either mock irradiated or treated for 20 s with white light at a total fluence  
591 of 60,000  $\mu\text{mol m}^{-2}$ . Reactions were performed for 5 min and stopped by addition of  
592 EDTA (pH 8.0) to a final concentration of 20 mM. Thiophosphorylated molecules were  
593 alkylated with 2.5 mM p-nitrobenzyl mesylate (PNBM, Abcam) for 2 hours. HA-tagged  
594 NPH3 was immunoprecipitated using Pierce™ Anti-HA Magnetic Beads (Thermo  
595 Fisher Scientific). Thiophosphorylation was visualised by immunoblotting with anti-  
596 thiophosphoester monoclonal antibody (clone 51-8, Abcam).

## 597 **Acknowledgements**

598 This work was supported by funding from the UK Biotechnology and Biological  
599 Sciences Research Council (BB/M002128/1, BB/R001499/1 to J.M.C) and the Grant-  
600 in-Aid for Scientific Research Grant from the Japan Society for the Promotion of  
601 Science (15KK0254 to N.S.). We are grateful to Albertus H. de Boer for providing 14-  
602 3-3 quadruple mutant seed. We are indebted to Claudia Oecking for sharing data and  
603 helpful discussions.

604

## 605 **Author Contributions**

606 S.S, N.S. and J.M.C designed research; S.S., T.W., L.H., D.P. and M.L. performed  
607 research; S.S, N.S. and J.M.C analysed data; S.S and J.M.C wrote the manuscript. All  
608 authors commented on the manuscript.

609

## 610 **References**

611

- 612 **Aitken, A., Collinge, D.B., van Heusden, B.P., Isobe, T., Roseboom, P.H.,**  
613 **Rosenfeld, G., and Soll, J.** (1992). 14-3-3 proteins: a highly conserved,  
614 widespread family of eukaryotic proteins. *Trends Biochem Sci* **17**, 498-501.
- 615 **Barbosa, I.C., and Schwechheimer, C.** (2014). Dynamic control of auxin transport-  
616 dependent growth by AGCVIII protein kinases. *Curr Opin Plant Biol* **22**, 108-  
617 115.
- 618 **Camoni, L., Visconti, S., Aducci, P., and Marra, M.** (2018). 14-3-3 Proteins in Plant  
619 Hormone Signaling: Doing Several Things at Once. *Front Plant Sci* **9**, 297.
- 620 **Cho, H.Y., Tseng, T.S., Kaiserli, E., Sullivan, S., Christie, J.M., and Briggs, W.R.**  
621 (2007). Physiological roles of the light, oxygen, or voltage domains of  
622 phototropin 1 and phototropin 2 in Arabidopsis. *Plant Physiol* **143**, 517-529.
- 623 **Christie, J.M.** (2007). Phototropin blue-light receptors. *Annu Rev Plant Biol* **58**, 21-45.
- 624 **Christie, J.M., and Murphy, A.S.** (2013). Shoot phototropism in higher plants: new  
625 light through old concepts. *Am J Bot* **100**, 35-46.
- 626 **Christie, J.M., Swartz, T.E., Bogomolni, R.A., and Briggs, W.R.** (2002). Phototropin  
627 LOV domains exhibit distinct roles in regulating photoreceptor function. *Plant J*  
628 **32**, 205-219.
- 629 **Christie, J.M., Blackwood, L., Petersen, J., and Sullivan, S.** (2015). Plant  
630 flavoprotein photoreceptors. *Plant Cell Physiol* **56**, 401-413.
- 631 **Christie, J.M., Suetsugu, N., Sullivan, S., and Wada, M.** (2018). Shining Light on the  
632 Function of NPH3/RPT2-Like Proteins in Phototropin Signaling. *Plant Physiol*  
633 **176**, 1015-1024.
- 634 **Christie, J.M., Salomon, M., Nozue, K., Wada, M., and Briggs, W.R.** (1999). LOV  
635 (light, oxygen, or voltage) domains of the blue-light photoreceptor phototropin  
636 (nph1): binding sites for the chromophore flavin mononucleotide. *Proc Natl*  
637 *Acad Sci U S A* **96**, 8779-8783.
- 638 **Christie, J.M., Yang, H., Richter, G.L., Sullivan, S., Thomson, C.E., Lin, J.,**  
639 **Titapiwatanakun, B., Ennis, M., Kaiserli, E., Lee, O.R., Adamec, J., Peer,**

- 640 **W.A., and Murphy, A.S.** (2011). phot1 inhibition of ABCB19 primes lateral  
641 auxin fluxes in the shoot apex required for phototropism. *PLoS Biol* **9**,  
642 e1001076.
- 643 **Davis, A.M., Hall, A., Millar, A.J., Darrah, C., and Davis, S.J.** (2009). Protocol:  
644 Streamlined sub-protocols for floral-dip transformation and selection of  
645 transformants in *Arabidopsis thaliana*. *Plant Methods* **5**, 3.
- 646 **DeLille, J.M., Sehne, P.C., and Ferl, R.J.** (2001). The arabidopsis 14-3-3 family of  
647 signaling regulators. *Plant Physiol* **126**, 35-38.
- 648 **Demarsy, E., Schepens, I., Okajima, K., Hersch, M., Bergmann, S., Christie, J.,**  
649 **Shimazaki, K., Tokutomi, S., and Fankhauser, C.** (2012). Phytochrome  
650 Kinase Substrate 4 is phosphorylated by the phototropin 1 photoreceptor.  
651 *EMBO J* **31**, 3457-3467.
- 652 **Durek, P., Schmidt, R., Heazlewood, J.L., Jones, A., MacLean, D., Nagel, A.,**  
653 **Kersten, B., and Schulze, W.X.** (2010). PhosPhAt: the *Arabidopsis thaliana*  
654 phosphorylation site database. An update. *Nucleic Acids Res* **38**, D828-834.
- 655 **Fankhauser, C., and Christie, J.M.** (2015). Plant phototropic growth. *Curr Biol* **25**,  
656 R384-389.
- 657 **Furutani, M., Kajiwara, T., Kato, T., Trembl, B.S., Stockum, C., Torres-Ruiz, R.A.,**  
658 **and Tasaka, M.** (2007). The gene MACCHI-BOU 4/ENHANCER OF PINOID  
659 encodes a NPH3-like protein and reveals similarities between organogenesis  
660 and phototropism at the molecular level. *Development* **134**, 3849-3859.
- 661 **Furutani, M., Sakamoto, N., Yoshida, S., Kajiwara, T., Robert, H.S., Friml, J., and**  
662 **Tasaka, M.** (2011). Polar-localized NPH3-like proteins regulate polarity and  
663 endocytosis of PIN-FORMED auxin efflux carriers. *Development* **138**, 2069-  
664 2078.
- 665 **Glanc, M., Van Gelderen, K., Hoermayer, L., Tan, S., Naramoto, S., Zhang, X.,**  
666 **Domjan, D., Vcelarova, L., Hauschild, R., Johnson, A., de Koning, E., van**  
667 **Dop, M., Rademacher, E., Janson, S., Wei, X., Molnar, G., Fendrych, M., De**  
668 **Rybel, B., Offringa, R., and Friml, J.** (2021). AGC kinases and MAB4/MEL  
669 proteins maintain PIN polarity by limiting lateral diffusion in plant cells. *Curr Biol*.
- 670 **Gotoh, E., Suetsugu, N., Yamori, W., Ishishita, K., Kiyabu, R., Fukuda, M., Higa,**  
671 **T., Shirouchi, B., and Wada, M.** (2018). Chloroplast Accumulation Response  
672 Enhances Leaf Photosynthesis and Plant Biomass Production. *Plant Physiol*  
673 **178**, 1358-1369.
- 674 **Haga, K., Takano, M., Neumann, R., and Iino, M.** (2005). The Rice COLEOPTILE  
675 PHOTOTROPISM1 gene encoding an ortholog of *Arabidopsis* NPH3 is required  
676 for phototropism of coleoptiles and lateral translocation of auxin. *Plant Cell* **17**,  
677 103-115.
- 678 **Haga, K., Tsuchida-Mayama, T., Yamada, M., and Sakai, T.** (2015). *Arabidopsis*  
679 ROOT PHOTOTROPISM2 Contributes to the Adaptation to High-Intensity Light  
680 in Phototropic Responses. *Plant Cell* **27**, 1098-1112.
- 681 **Harada, A., Takemiya, A., Inoue, S., Sakai, T., and Shimazaki, K.** (2013). Role of  
682 RPT2 in leaf positioning and flattening and a possible inhibition of phot2  
683 signaling by phot1. *Plant Cell Physiol* **54**, 36-47.
- 684 **Hart, J.E., Sullivan, S., Hermanowicz, P., Petersen, J., Diaz-Ramos, L.A., Hoey,**  
685 **D.J., Labuz, J., and Christie, J.M.** (2019). Engineering the phototropin  
686 photocycle improves photoreceptor performance and plant biomass production.  
687 *Proc Natl Acad Sci U S A* **116**, 12550-12557.

- 688 **Hiyama, A., Takemiya, A., Munemasa, S., Okuma, E., Sugiyama, N., Tada, Y.,**  
689 **Murata, Y., and Shimazaki, K.I.** (2017). Blue light and CO<sub>2</sub> signals converge  
690 to regulate light-induced stomatal opening. *Nat Commun* **8**, 1284.
- 691 **Inada, S., Ohgishi, M., Mayama, T., Okada, K., and Sakai, T.** (2004). RPT2 is a  
692 signal transducer involved in phototropic response and stomatal opening by  
693 association with phototropin 1 in *Arabidopsis thaliana*. *Plant Cell* **16**, 887-896.
- 694 **Inoue, S., Kinoshita, T., Takemiya, A., Doi, M., and Shimazaki, K.** (2008a). Leaf  
695 positioning of *Arabidopsis* in response to blue light. *Mol Plant* **1**, 15-26.
- 696 **Inoue, S., Kinoshita, T., Matsumoto, M., Nakayama, K.I., Doi, M., and Shimazaki,**  
697 **K.** (2008b). Blue light-induced autophosphorylation of phototropin is a primary  
698 step for signaling. *Proc Natl Acad Sci U S A* **105**, 5626-5631.
- 699 **Inoue, S., Matsushita, T., Tomokiyo, Y., Matsumoto, M., Nakayama, K.I.,**  
700 **Kinoshita, T., and Shimazaki, K.** (2011). Functional analyses of the activation  
701 loop of phototropin2 in *Arabidopsis*. *Plant Physiol* **156**, 117-128.
- 702 **Johnson, C., Crowther, S., Stafford, M.J., Campbell, D.G., Toth, R., and**  
703 **MacKintosh, C.** (2010). Bioinformatic and experimental survey of 14-3-3-  
704 binding sites. *Biochem J* **427**, 69-78.
- 705 **Kaiserli, E., Sullivan, S., Jones, M.A., Feeney, K.A., and Christie, J.M.** (2009).  
706 Domain swapping to assess the mechanistic basis of *Arabidopsis* phototropin 1  
707 receptor kinase activation and endocytosis by blue light. *Plant Cell* **21**, 3226-  
708 3244.
- 709 **Keicher, J., Jaspert, N., Weckermann, K., Moller, C., Throm, C., Kintzi, A., and**  
710 **Oecking, C.** (2017). *Arabidopsis* 14-3-3 epsilon members contribute to polarity  
711 of PIN auxin carrier and auxin transport-related development. *Elife* **6**.
- 712 **Kimura, T., Tsuchida-Mayama, T., Imai, H., Okajima, K., Ito, K., and Sakai, T.**  
713 (2020). *Arabidopsis* ROOT PHOTOTROPISM2 Is a Light-Dependent Dynamic  
714 Modulator of Phototropin1. *Plant Cell* **32**, 2004-2019.
- 715 **Kimura, T., Haga, K., Shimizu-Mitao, Y., Takebayashi, Y., Kasahara, H., Hayashi,**  
716 **K.I., Kakimoto, T., and Sakai, T.** (2018). Asymmetric Auxin Distribution is Not  
717 Required to Establish Root Phototropism in *Arabidopsis*. *Plant Cell Physiol* **59**,  
718 823-835.
- 719 **Kinoshita, T., Emi, T., Tominaga, M., Sakamoto, K., Shigenaga, A., Doi, M., and**  
720 **Shimazaki, K.** (2003). Blue-light- and phosphorylation-dependent binding of a  
721 14-3-3 protein to phototropins in stomatal guard cells of broad bean. *Plant*  
722 *Physiol* **133**, 1453-1463.
- 723 **Li, Y., Dai, X., Cheng, Y., and Zhao, Y.** (2011). NPY genes play an essential role in  
724 root gravitropic responses in *Arabidopsis*. *Mol Plant* **4**, 171-179.
- 725 **Liscum, E., and Briggs, W.R.** (1996). Mutations of *Arabidopsis* in potential  
726 transduction and response components of the phototropic signaling pathway.  
727 *Plant Physiol* **112**, 291-296.
- 728 **Maudoux, O., Batoko, H., Oecking, C., Gevaert, K., Vandekerckhove, J., Boutry,**  
729 **M., and Morsomme, P.** (2000). A plant plasma membrane H<sup>+</sup>-ATPase  
730 expressed in yeast is activated by phosphorylation at its penultimate residue  
731 and binding of 14-3-3 regulatory proteins in the absence of fusicoccin. *J Biol*  
732 *Chem* **275**, 17762-17770.
- 733 **Motchoulski, A., and Liscum, E.** (1999). *Arabidopsis* NPH3: A NPH1 photoreceptor-  
734 interacting protein essential for phototropism. *Science* **286**, 961-964.
- 735 **Pedmale, U.V., and Liscum, E.** (2007). Regulation of phototropic signaling in  
736 *Arabidopsis* via phosphorylation state changes in the phototropin 1-interacting  
737 protein NPH3. *J Biol Chem* **282**, 19992-20001.



- 738 **Pedmale, U.V., Celaya, R.B., and Liscum, E.** (2010). Phototropism: mechanism and  
739 outcomes. *Arabidopsis Book* **8**, e0125.
- 740 **Ramm, G., Larance, M., Guilhaus, M., and James, D.E.** (2006). A role for 14-3-3 in  
741 insulin-stimulated GLUT4 translocation through its interaction with the RabGAP  
742 AS160. *J Biol Chem* **281**, 29174-29180.
- 743 **Roberts, D., Pedmale, U.V., Morrow, J., Sachdev, S., Lechner, E., Tang, X., Zheng,  
744 N., Hannink, M., Genschik, P., and Liscum, E.** (2011). Modulation of  
745 phototropic responsiveness in Arabidopsis through ubiquitination of phototropin  
746 1 by the CUL3-Ring E3 ubiquitin ligase CRL3(NPH3). *Plant Cell* **23**, 3627-3640.
- 747 **Sakai, T., Wada, T., Ishiguro, S., and Okada, K.** (2000). RPT2. A signal transducer  
748 of the phototropic response in Arabidopsis. *Plant Cell* **12**, 225-236.
- 749 **Sakai, T., Kagawa, T., Kasahara, M., Swartz, T.E., Christie, J.M., Briggs, W.R.,  
750 Wada, M., and Okada, K.** (2001). Arabidopsis *nph1* and *npl1*: blue light  
751 receptors that mediate both phototropism and chloroplast relocation. *Proc Natl  
752 Acad Sci U S A* **98**, 6969-6974.
- 753 **Salomon, M., Zacherl, M., and Rudiger, W.** (1997). Asymmetric, blue light-dependent  
754 phosphorylation of a 116-kilodalton plasma membrane protein can be  
755 correlated with the first- and second-positive phototropic curvature of oat  
756 coleoptiles. *Plant Physiol* **115**, 485-491.
- 757 **Schindelin, J., Arganda-Carreras, I., Frise, E., Kaynig, V., Longair, M., Pietzsch,  
758 T., Preibisch, S., Rueden, C., Saalfeld, S., Schmid, B., Tinevez, J.Y., White,  
759 D.J., Hartenstein, V., Eliceiri, K., Tomancak, P., and Cardona, A.** (2012). Fiji:  
760 an open-source platform for biological-image analysis. *Nat Methods* **9**, 676-682.
- 761 **Schnabel, J., Hombach, P., Waksman, T., Giuriani, G., Petersen, J., and Christie,  
762 J.M.** (2018). A chemical genetic approach to engineer phototropin kinases for  
763 substrate labeling. *J Biol Chem* **293**, 5613-5623.
- 764 **Schoonheim, P.J., Sinnige, M.P., Casaretto, J.A., Veiga, H., Bunney, T.D.,  
765 Quatrano, R.S., and de Boer, A.H.** (2007). 14-3-3 adaptor proteins are  
766 intermediates in ABA signal transduction during barley seed germination. *Plant  
767 J* **49**, 289-301.
- 768 **Schumacher, P., Demarsy, E., Waridel, P., Petrolati, L.A., Trevisan, M., and  
769 Fankhauser, C.** (2018). A phosphorylation switch turns a positive regulator of  
770 phototropism into an inhibitor of the process. *Nat Commun* **9**, 2403.
- 771 **Suetsugu, N., Takemiya, A., Kong, S.G., Higa, T., Komatsu, A., Shimazaki, K.,  
772 Kohchi, T., and Wada, M.** (2016). RPT2/NCH1 subfamily of NPH3-like proteins  
773 is essential for the chloroplast accumulation response in land plants. *Proc Natl  
774 Acad Sci U S A* **113**, 10424-10429.
- 775 **Sullivan, S., Thomson, C.E., Kaiserli, E., and Christie, J.M.** (2009). Interaction  
776 specificity of Arabidopsis 14-3-3 proteins with phototropin receptor kinases.  
777 *FEBS Lett* **583**, 2187-2193.
- 778 **Sullivan, S., Thomson, C.E., Lamont, D.J., Jones, M.A., and Christie, J.M.** (2008).  
779 In vivo phosphorylation site mapping and functional characterization of  
780 Arabidopsis phototropin 1. *Mol Plant* **1**, 178-194.
- 781 **Sullivan, S., Kharshiing, E., Laird, J., Sakai, T., and Christie, J.M.** (2019).  
782 Deetiolation Enhances Phototropism by Modulating NON-PHOTOTROPIC  
783 HYPOCOTYL3 Phosphorylation Status. *Plant Physiol* **180**, 1119-1131.
- 784 **Sullivan, S., Takemiya, A., Kharshiing, E., Cloix, C., Shimazaki, K.I., and Christie,  
785 J.M.** (2016). Functional characterization of Arabidopsis phototropin 1 in the  
786 hypocotyl apex. *Plant J* **88**, 907-920.

- 787 **Takemiya, A., Inoue, S., Doi, M., Kinoshita, T., and Shimazaki, K.** (2005).  
788 Phototropins promote plant growth in response to blue light in low light  
789 environments. *Plant Cell* **17**, 1120-1127.
- 790 **Takemiya, A., Sugiyama, N., Fujimoto, H., Tsutsumi, T., Yamauchi, S., Hiyama,**  
791 **A., Tada, Y., Christie, J.M., and Shimazaki, K.** (2013). Phosphorylation of  
792 BLUS1 kinase by phototropins is a primary step in stomatal opening. *Nat*  
793 *Commun* **4**, 2094.
- 794 **Tseng, T.S., Whippo, C., Hangarter, R.P., and Briggs, W.R.** (2012). The role of a  
795 14-3-3 protein in stomatal opening mediated by PHOT2 in Arabidopsis. *Plant*  
796 *Cell* **24**, 1114-1126.
- 797 **Tsuchida-Mayama, T., Nakano, M., Uehara, Y., Sano, M., Fujisawa, N., Okada, K.,**  
798 **and Sakai, T.** (2008). Mapping of the phosphorylation sites on the phototropic  
799 signal transducer, NPH3. *Plant Sci* **174**, 626-633.
- 800 **van Kleeff, P.J., Jaspert, N., Li, K.W., Rauch, S., Oecking, C., and de Boer, A.H.**  
801 (2014). Higher order Arabidopsis 14-3-3 mutants show 14-3-3 involvement in  
802 primary root growth both under control and abiotic stress conditions. *J Exp Bot*  
803 **65**, 5877-5888.
- 804 **Wan, Y., Jasik, J., Wang, L., Hao, H., Volkmann, D., Menzel, D., Mancuso, S.,**  
805 **Baluska, F., and Lin, J.** (2012). The signal transducer NPH3 integrates the  
806 phototropin1 photosensor with PIN2-based polar auxin transport in Arabidopsis  
807 root phototropism. *Plant Cell* **24**, 551-565.
- 808 **Wang, B., Yang, H., Liu, Y.C., Jelinek, T., Zhang, L., Ruoslahti, E., and Fu, H.**  
809 (1999). Isolation of high-affinity peptide antagonists of 14-3-3 proteins by phage  
810 display. *Biochemistry* **38**, 12499-12504.
- 811 **Willems, P., Horne, A., Van Parys, T., Goormachtig, S., De Smet, I., Botzki, A.,**  
812 **Van Breusegem, F., and Gevaert, K.** (2019). The Plant PTM Viewer, a central  
813 resource for exploring plant protein modifications. *Plant J* **99**, 752-762.  
814  
815



## Figures

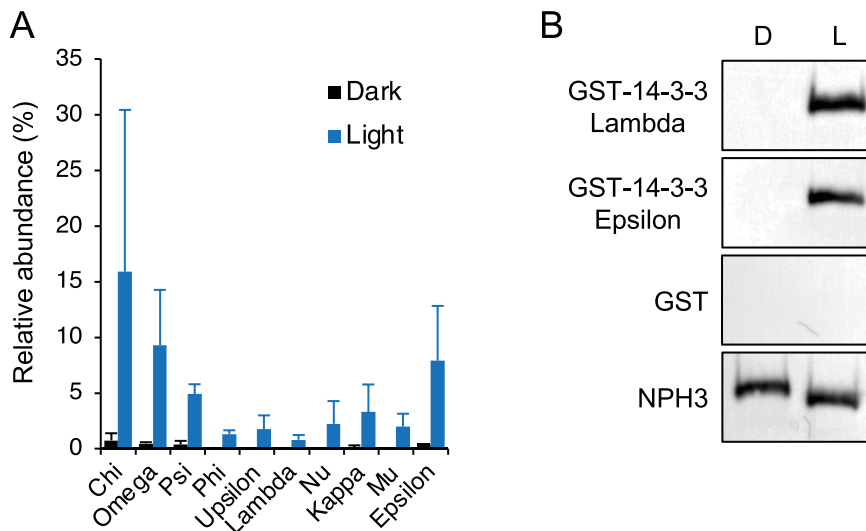

**Fig. 1.** NPH3 interacts with 14-3-3 proteins in a light-dependent manner. (A) NPH3 interacting proteins were identified by mass spectrometry analysis of anti-GFP immunoprecipitations from etiolated seedlings expressing GFP-NPH3 maintained in darkness (Dark) or irradiated with  $20 \mu\text{mol m}^{-2} \text{s}^{-1}$  of blue light for 15 min (Light). Each value is the mean and S.D. from two biological replicates. Protein signal intensities were converted to relative abundance of the bait protein (GFP-NPH3). (B) Far-western blot analysis of anti-GFP immunoprecipitations from etiolated seedlings expressing GFP-NPH3 maintained in darkness (D) or irradiated with  $20 \mu\text{mol m}^{-2} \text{s}^{-1}$  of blue light for 15 (L). GST-tagged 14-3-3 isoforms (Lambda and Epsilon) or GST alone were used as probes. Blots were probed with anti-GFP antibody as loading control (bottom panel).

**Table S1.** GFP-NPH3 interacting proteins identified by mass spectrometry analysis of anti-GFP immunoprecipitations.



NPH3 and coiled-coil (CC) domains are indicated. (B) Confocal images of GFP-NPH3 (NPH3) and phosphorylation site mutants (M1, M2 and M3) transiently expressed in leaves of *N. benthamiana*. Plants were dark-adapted before confocal observation and images acquired immediately (scan 1) and after repeat scanning with the 488 nm laser (scan 5). Bar, 50  $\mu\text{m}$ . (C) Immunoblot analysis of protein extracts from leaves of *N. benthamiana* transiently expressing GFP-NPH3 (NPH3) and phosphorylation site mutants (M1, M2 and M3). Plants were dark-adapted and maintained in darkness (D) or irradiated with 20  $\mu\text{mol m}^{-2} \text{s}^{-1}$  of blue light for 15 min (L). Protein extracts were probed with anti-GFP antibodies. (D) Confocal images of GFP-NPH3 (NPH3) and phosphorylation site mutants S744A S746A, S744A and S746A transiently expressed in leaves of *N. benthamiana*. Plants were dark-adapted before confocal observation and images acquired immediately (scan 1) and after repeat scanning with the 488 nm laser (scan 5). Bar, 50  $\mu\text{m}$ . (E) Immunoblot analysis of protein extracts from leaves of *N. benthamiana* transiently expressing GFP-NPH3 (NPH3) and phosphorylation site mutants S744A S746A, S744A and S746A. Plants were dark-adapted and maintained in darkness (D) or irradiated with 20  $\mu\text{mol m}^{-2} \text{s}^{-1}$  of blue light for 15 min (L). Protein extracts were probed with anti-GFP antibodies.

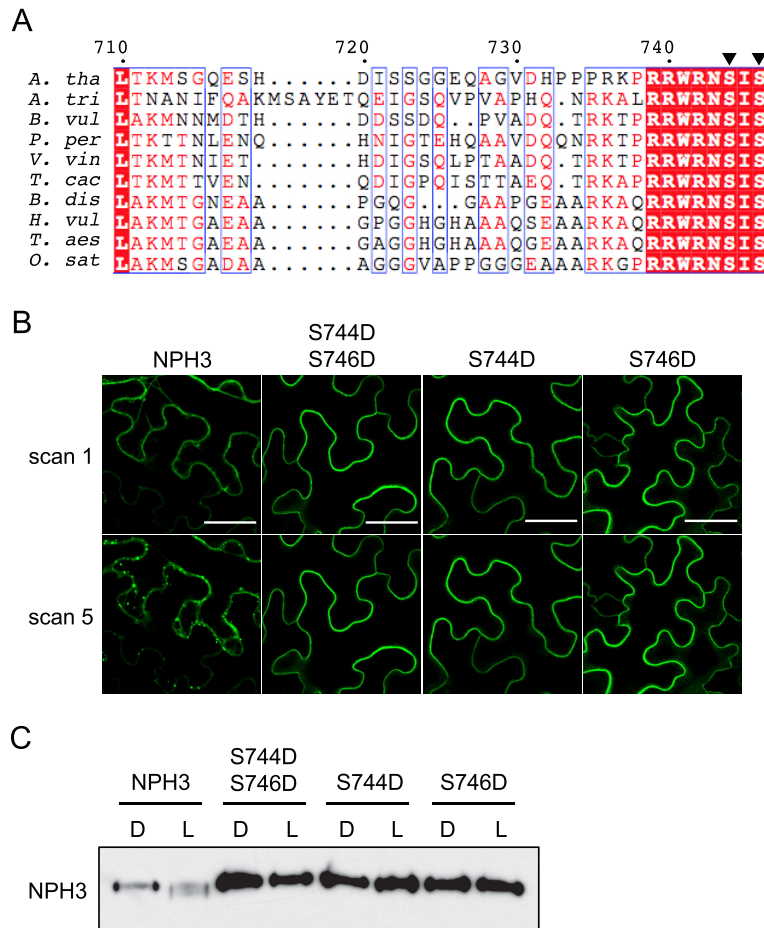

**Fig. S1.** Mutational analysis of NPH3 phosphorylation sites. (A) Amino acid alignment of the C-terminus of NPH3 from *Arabidopsis thaliana* (*A. tha*), *Amborella trichopoda* (*A. tri*), *Beta vulgaris* (*B. vul*), *Prunus persica* (*P. per*), *Vitis vinifera* (*V. vin*), *Theobroma cacao* (*T. cac*), *Brachypodium distachyon* (*B. dis*), *Hordeum vulgare* (*H. vul*) *Triticum aestivum* (*T. aes*) and *Oryza sativa* (*O. sat*). The two conserved serine residues (*A. tha*, S744 and S746) are indicated by arrow heads. (B) Confocal images of GFP-NPH3 (NPH3) and phosphorylation site mutants S744D S746D, S744D and S746D transiently expressed in leaves of *N. benthamiana*. Plants were dark-adapted before confocal observation and images acquired immediately (scan 1) and after repeat scanning with the 488 nm laser (scan 5). Bar, 50  $\mu$ m. (C) Immunoblot analysis of protein extracts from leaves of *N. benthamiana* transiently expressing GFP-NPH3 (NPH3) and phosphorylation site mutants S744D S746D, S744D and S746D. Plants were dark-adapted and maintained in darkness (D) or irradiated with 20  $\mu$ mol m<sup>-2</sup> s<sup>-1</sup> of blue light for 15 min (L). Protein extracts were probed with anti-GFP antibodies.

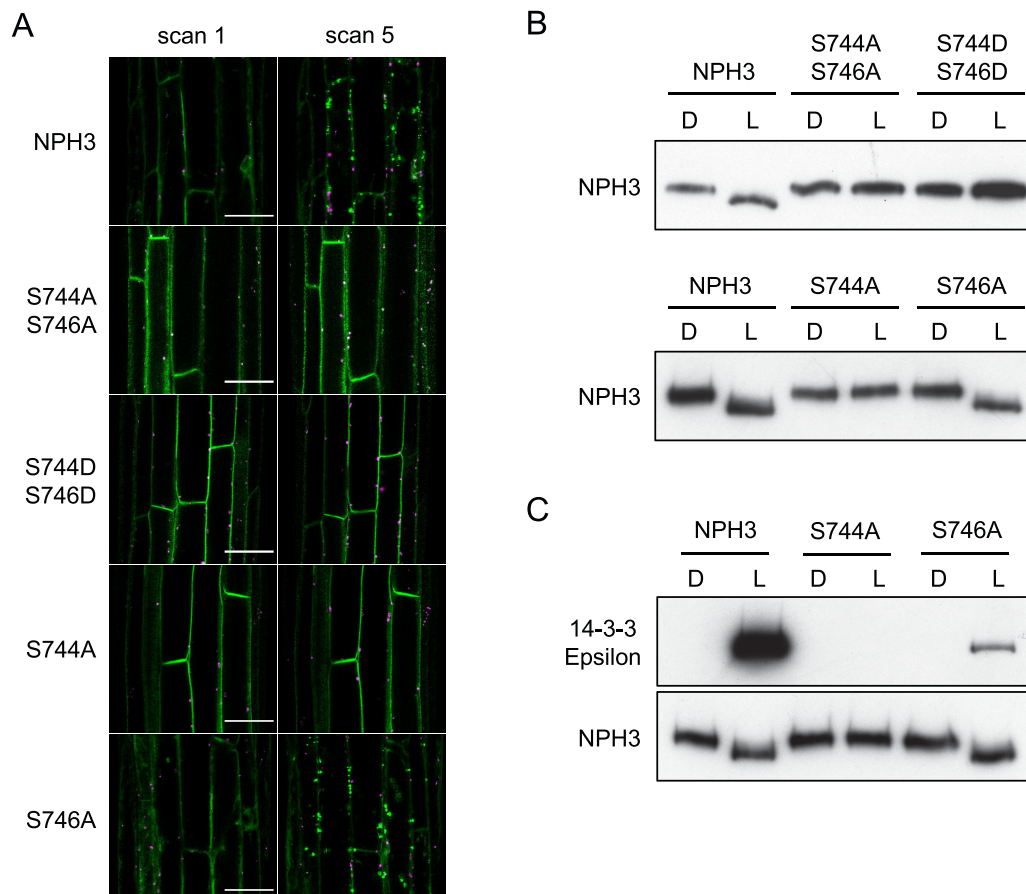

**Fig. 3.** S744 is required for 14-3-3 binding and early signalling events. (A) Confocal images of hypocotyl cells of etiolated seedlings expressing GFP-NPH3 (NPH3) or phosphorylation site mutants S744A S746A, S744D S746D, S744A and S746A. Seedlings were scanned immediately (scan 1) and again after repeat scanning with the 488 nm laser (scan 5). GFP is shown in green and autofluorescence in magenta. Bar, 50  $\mu\text{m}$ . (B) Immunoblot analysis of total protein extracts from etiolated seedlings expressing GFP-NPH3 (NPH3) or phosphorylation site mutants maintained in darkness (D) or irradiated with  $20 \mu\text{mol m}^{-2} \text{s}^{-1}$  blue light for 15 min (L). Protein extracts were probed with anti-NPH3 antibodies. (C) Far-western blot analysis of anti-GFP immunoprecipitations from etiolated seedlings expressing GFP-NPH3 (NPH3) or phosphorylation site mutants (S744A or S746A) maintained in darkness (D) or irradiated with  $20 \mu\text{mol m}^{-2} \text{s}^{-1}$  of blue light for 15 min blue light (L). GST-tagged 14-3-3 isoform Epsilon was used as the probe. Blots were probed with anti-NPH3 antibody as loading control (bottom panel).

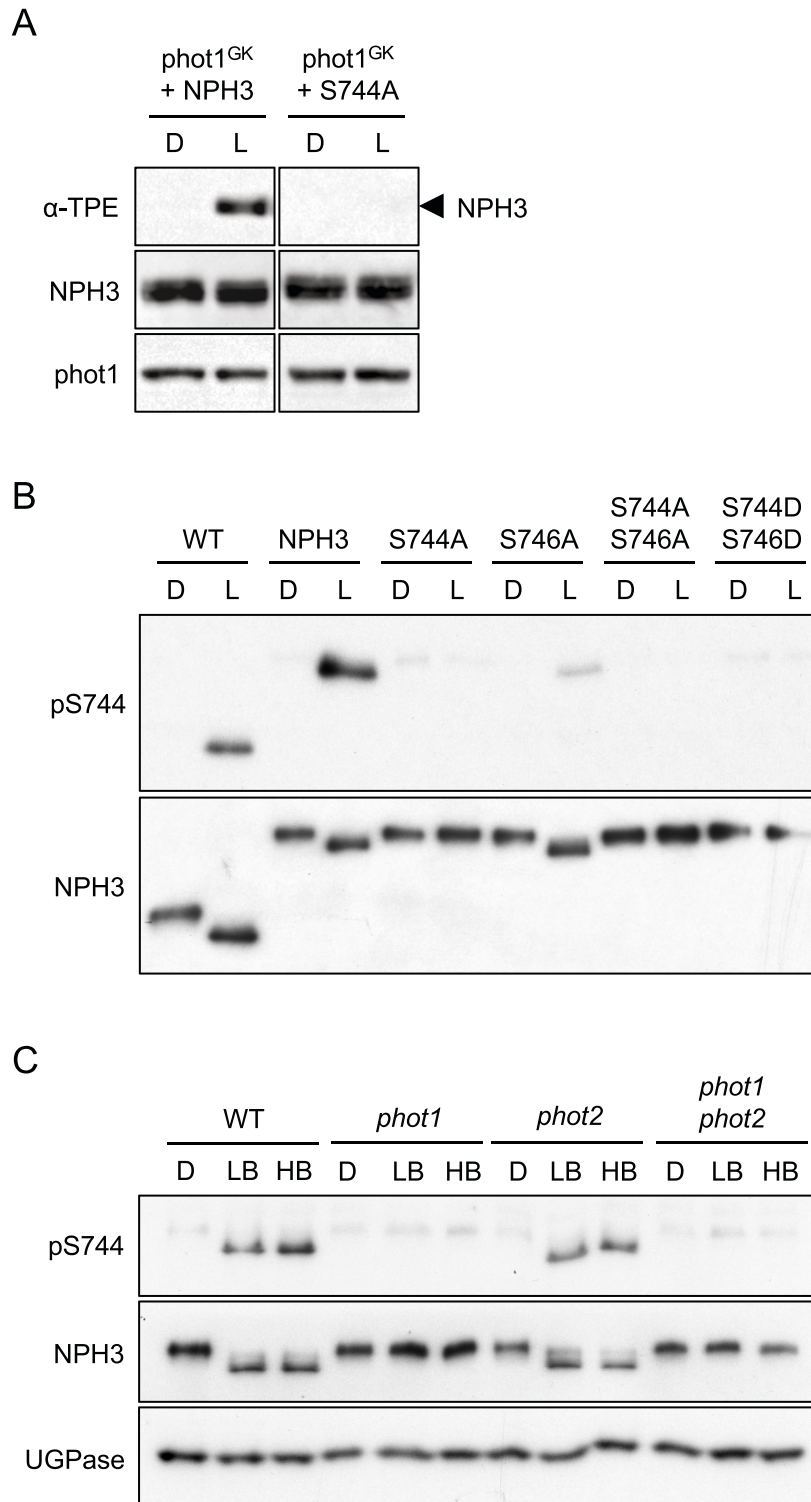

**Fig. 4.** Phot1 phosphorylates NPH3 at position S744 in a light-dependent manner. (A) Thiophosphorylation analysis of *in vitro* kinase assays containing gatekeeper engineered phot1 (phot1<sup>GK</sup>) and NPH3 or NPH3-S744A. Reactions were performed in the absence (D) or presence of 20 s of white light (L), and thiophosphorylation was detected using anti-thiophosphoester antibody (α-TPE). Blots were probed with anti-NPH3 and anti-phot1 antibodies. (B) Immunoblot analysis of total protein extracts from



etiolated seedlings expressing GFP-NPH3 (NPH3) or phosphorylation site mutants maintained in darkness (D) or irradiated with  $20 \mu\text{mol m}^{-2} \text{s}^{-1}$  blue light for 15 min (L). Protein extracts were probed with phospho-specific pS744 antibody and anti-NPH3 antibodies. (C) Immunoblot analysis of total protein extracts from etiolated wild-type (WT) or *phot1*, *phot2* and *phot1 phot2* mutant seedlings maintained in darkness (D) or irradiated with  $0.5 \mu\text{mol m}^{-2} \text{s}^{-1}$  (low blue; LB) or  $50 \mu\text{mol m}^{-2} \text{s}^{-1}$  (high blue; HB) of blue light for 60 min. Blots were probed with phospho-specific pS744 antibody, anti-NPH3 anti-UGPase (loading control) antibodies.



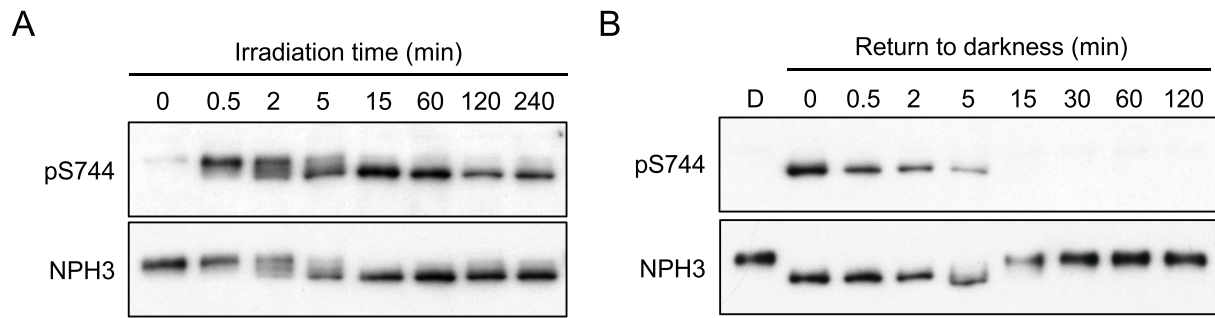

**Fig. 5.** Kinetics of phot1-mediated phosphorylation of NPH3. (A) Time-course of S744 phosphorylation. Immunoblot analysis of total protein extracts from etiolated wild-type seedlings irradiated with  $0.5 \mu\text{mol m}^{-2} \text{s}^{-1}$  of blue light for the time indicated. Blots were probed with anti-pS744 and anti-NPH3 antibodies. (B) Time-course of S744 dephosphorylation. Immunoblot analysis of total protein extracts from etiolated wild-type seedlings maintained in darkness (D) or irradiated with  $0.5 \mu\text{mol m}^{-2} \text{s}^{-1}$  for 15 min and returned to darkness for the time indicated. Blots were probed with anti-pS744 and anti-NPH3 antibodies.

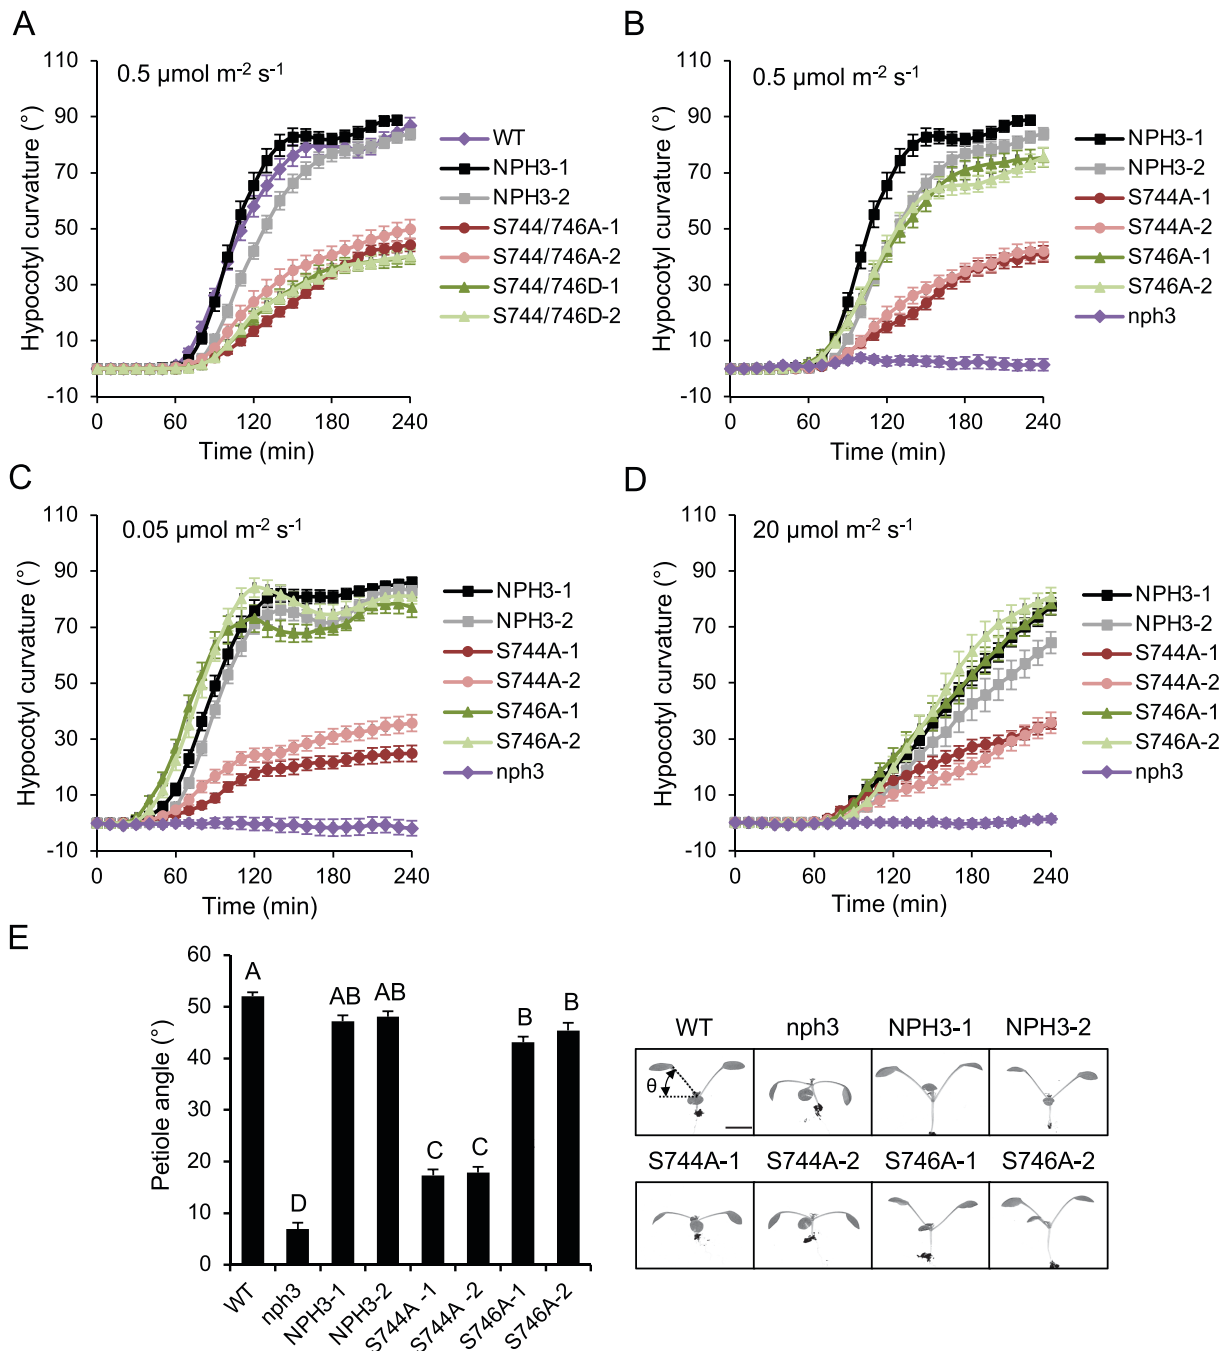

**Fig. 6.** Phot1 phosphorylation of NPH3 promotes functionality. (A) Phototropism of etiolated wild-type (WT) seedlings, seedlings expressing GFP-NPH3 (NPH3) or phosphorylation site mutants S744A S746A and S744D S746D irradiated with 0.5  $\mu\text{mol m}^{-2} \text{s}^{-1}$  unilateral blue light. (B – D) Phototropism of etiolated seedlings expressing GFP-NPH3 (NPH3), phosphorylation site mutants S744A or S746A and *nph3* mutant seedling irradiated with (B) 0.5  $\mu\text{mol m}^{-2} \text{s}^{-1}$ , (C) 0.05  $\mu\text{mol m}^{-2} \text{s}^{-1}$  or (D) 20  $\mu\text{mol m}^{-2} \text{s}^{-1}$  unilateral blue light. Hypocotyl curvatures were measured every 10 min for 4 h, and each value is the mean  $\pm$  SE of 17-20 seedlings. (E) Petiole positioning of WT, *nph3* mutant, and seedlings expressing GFP-NPH3 or phosphorylation site mutants S744A

and S746A. Plants were grown under  $80 \mu\text{mol m}^{-2} \text{s}^{-1}$  white light for 9 d before transfer to  $10 \mu\text{mol m}^{-2} \text{s}^{-1}$  white light for 5 d. Petiole angle from the horizontal was measured for the first true leaves, each value is the mean  $\pm$  SE of 20 seedlings. Means that do not share a letter are significantly different ( $P < 0.01$ , one-way ANOVA with Tukey HSD post-test). Representative images for each genotype are shown on the right. Bar, 5 mm.

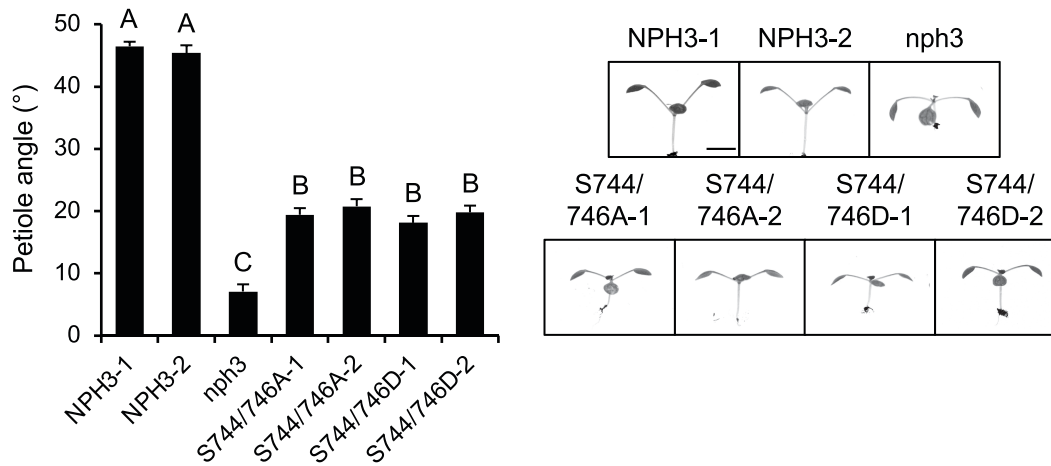

**Fig. S2.** Phot1 phosphorylation of NPH3 promotes functionality. (A) Petiole positioning of *nph3* mutant and seedlings expressing GFP-NPH3 (NPH3) or phosphorylation site mutants S744A S746A and S744D S746D. Plants were grown under  $80 \mu\text{mol m}^{-2} \text{s}^{-1}$  white light for 9 d before transfer to  $10 \mu\text{mol m}^{-2} \text{s}^{-1}$  white light for 5 d. Petiole angle from the horizontal was measured for the first true leaves, each value is the mean  $\pm$  SE of 20 seedlings. Means that do not share a letter are significantly different ( $P < 0.01$ , one-way ANOVA with Tukey HSD post-test). Representative images for each genotype are shown on the right. Bar, 5 mm.

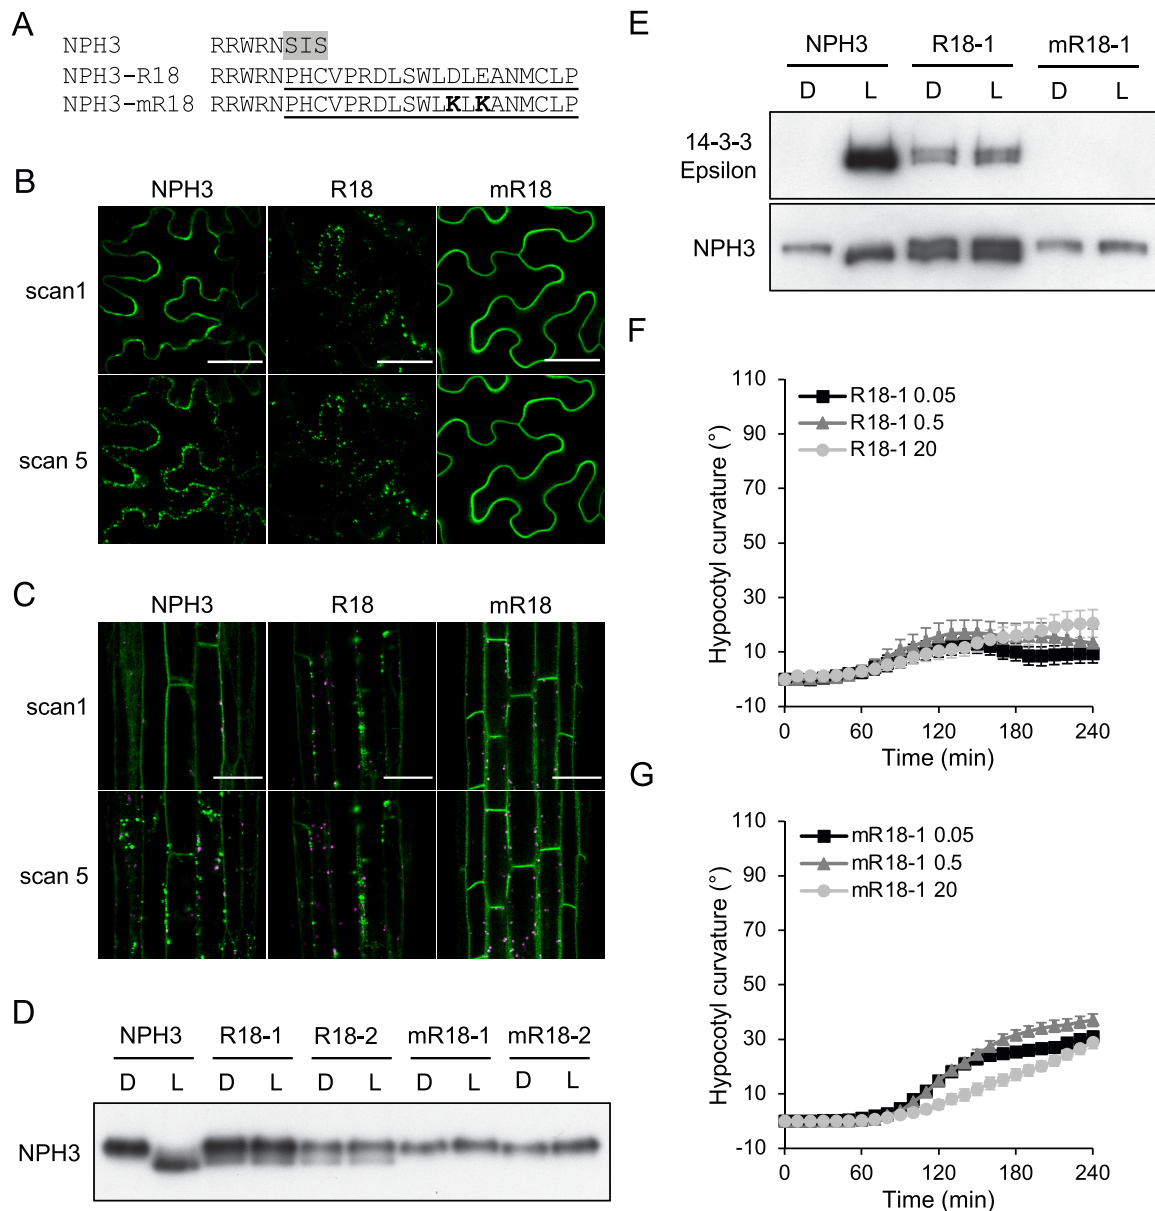

**Fig. 7.** Analysis of a constitutive 14-3-3 binding NPH3 variant. (A) Amino acid sequence of the NPH3-R18 and mR18 constructs. Residues 744 – 746 of NPH3 (grey shaded) were replaced with the R18 peptide sequence (underlined). Two lysine residues (bold) were introduced into the mR18 sequence abolish 14-3-3 binding. Confocal images of GFP-NPH3 (NPH3), GFP-NPH3 containing the R18 peptide sequence (R18) or the mutated R18 peptide sequence (mR18) (B) transiently expressed in leaves of *N. benthamiana* plants, dark-adapted before confocal observation and (C) in hypocotyl cells of etiolated transgenic *Arabidopsis* seedlings. Images acquired immediately (scan 1) and after repeat scanning with the 488 nm laser (scan 5). GFP is shown in green and autofluorescence in magenta. Bar, 50  $\mu$ m. (D) Immunoblot analysis of total protein extracts from etiolated seedlings expressing

NPH3, R18 or mR18 maintained in darkness (D) or irradiated with  $20 \mu\text{mol m}^{-2} \text{s}^{-1}$  blue light for 15 min (L). Protein extracts were probed with anti-NPH3 antibodies. (E) Far-western blot analysis of anti-GFP immunoprecipitations from etiolated seedlings expressing NPH3, R18 or mR18 maintained in darkness (D) or irradiated with  $20 \mu\text{mol m}^{-2} \text{s}^{-1}$  of blue light for 15 min blue light (L). GST-tagged 14-3-3 isoform Epsilon was used as the probe. Blots were probed with anti-NPH3 antibody as loading control (bottom panel). Phototropism of etiolated seedlings expressing (F) R18 or (G) mR18 irradiated with  $0.05 \mu\text{mol m}^{-2} \text{s}^{-1}$ ,  $0.5 \mu\text{mol m}^{-2} \text{s}^{-1}$  or  $20 \mu\text{mol m}^{-2} \text{s}^{-1}$  unilateral blue light. Hypocotyl curvatures were measured every 10 min for 4 h, and each value is the mean  $\pm$  SE of 20 seedlings.



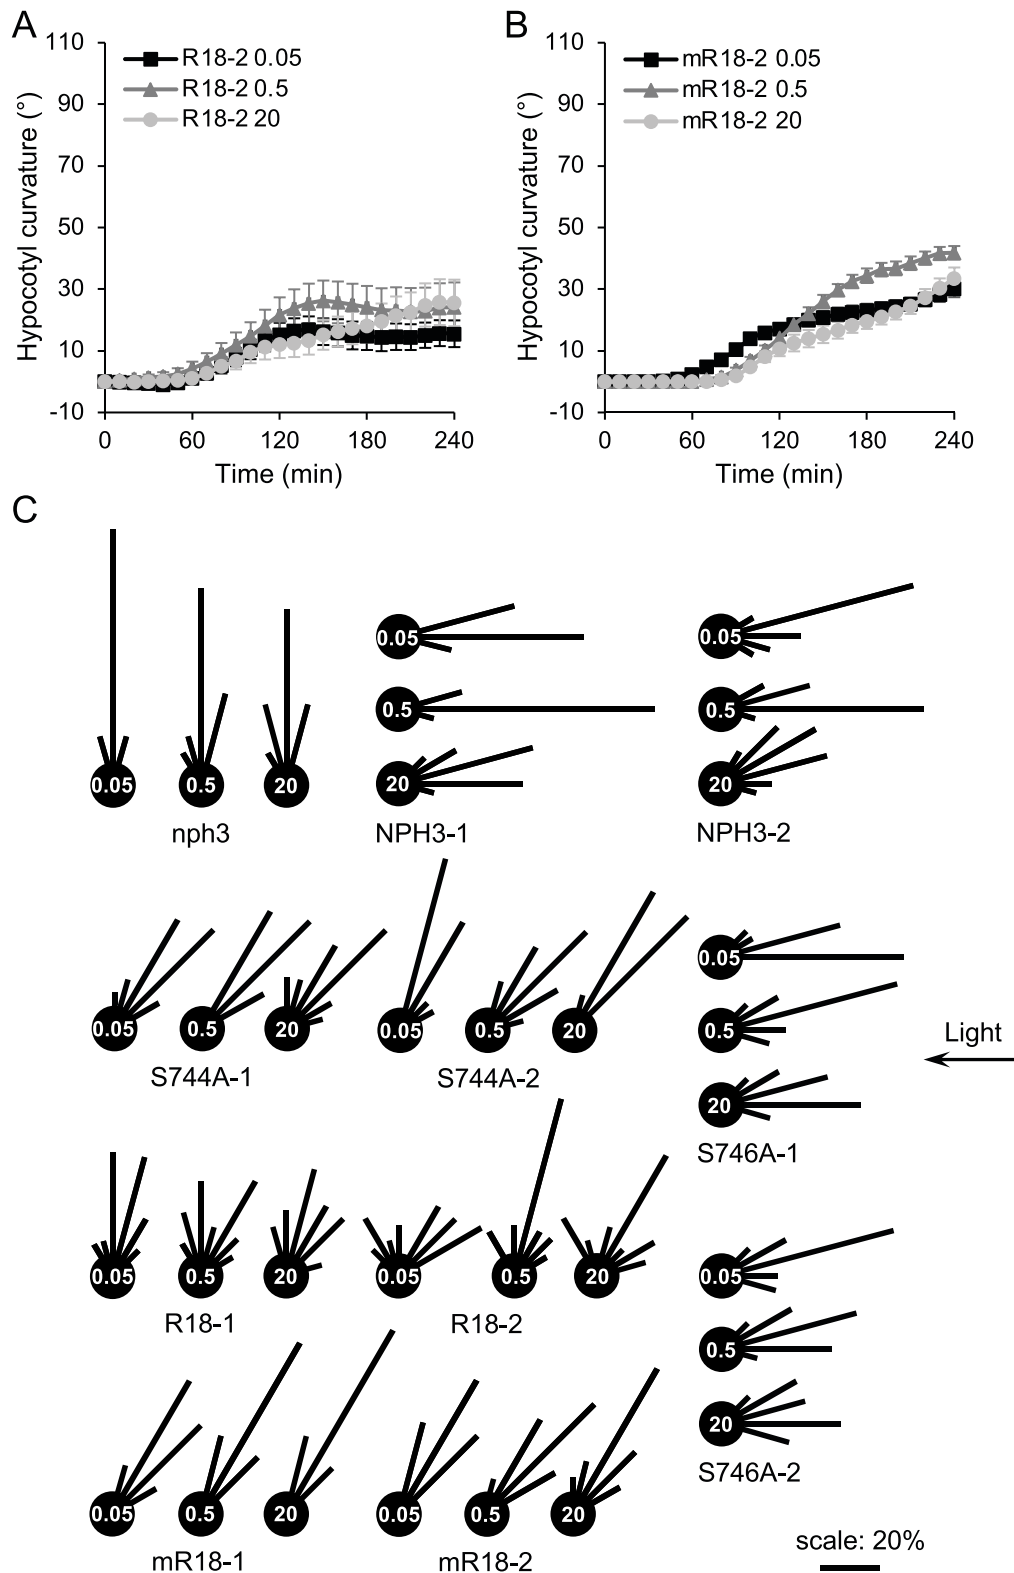

**Fig. S3.** Analysis of a constitutive 14-3-3 binding NPH3 variant. Phototropism of etiolated seedlings expressing (A) R18 or (B) mR18 irradiated with 0.05  $\mu\text{mol m}^{-2} \text{s}^{-1}$ , 0.5  $\mu\text{mol m}^{-2} \text{s}^{-1}$  or 20  $\mu\text{mol m}^{-2} \text{s}^{-1}$  unilateral blue light. Hypocotyl curvatures were measured every 10 min for 4 h, and each value is the mean  $\pm$  SE of 18-20 seedlings. (C) Circular histograms depicting hypocotyl orientation after 240 min of irradiation with

0.05  $\mu\text{mol m}^{-2} \text{s}^{-1}$ , 0.5  $\mu\text{mol m}^{-2} \text{s}^{-1}$  or 20  $\mu\text{mol m}^{-2} \text{s}^{-1}$  unilateral blue light. Angles were grouped into 15° classes and expressed as percentages of the number of seedlings.

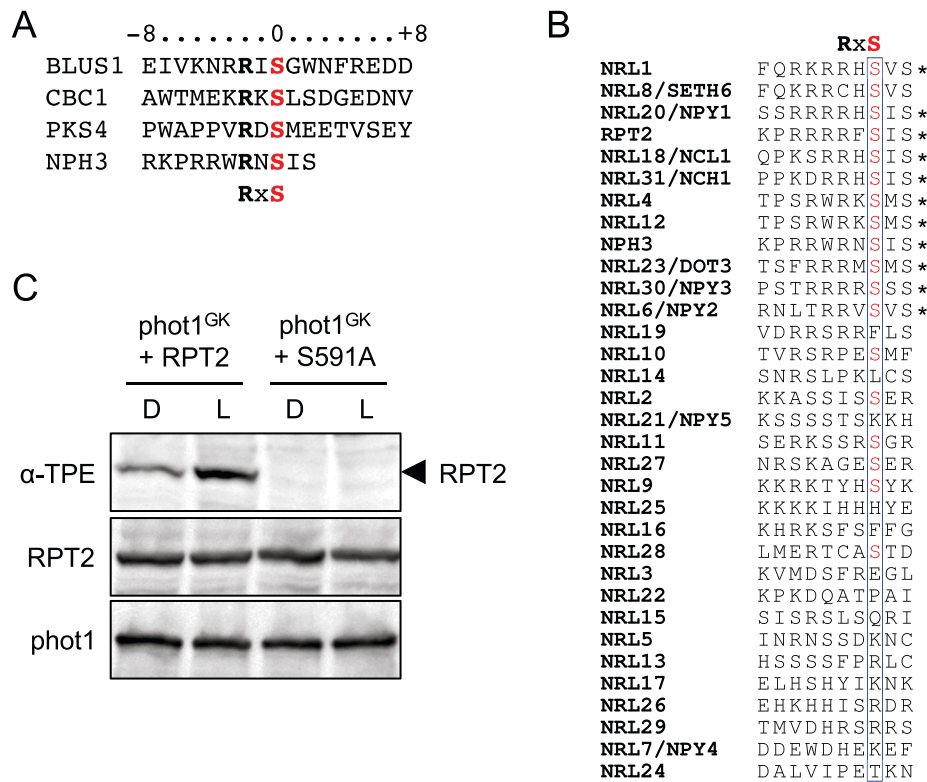

**Fig. S4.** Conservation of the phot1 phosphorylation sequence of NPH3. (A) Amino acid sequence alignment of the phototropin1 substrate phosphorylation sites in BLUS1 (Takemiya et al., 2013), CBC1 (Hiyama et al., 2017), PKS4 (Schumacher et al., 2018) and NPH3. The amino acid residues are numbered relative to the phosphorylated serine residue and the PKA-like phosphorylation motif is indicated below. (B) Amino acid alignment of the last 10 residues of the *Arabidopsis* NRL protein family. The position of the RxS phosphorylation motif is indicated above and sequences containing a RxS motif denoted with an asterisk. (C) Thiophosphorylation analysis of *in vitro* kinase assays containing gatekeeper engineered phot1 (phot1<sup>GK</sup>) and RPT2 or RPT2-S591A. Reactions were performed in the absence (D) or presence of 20 s of white light (L), and thiophosphorylation was detected using anti-thiophosphoester antibody (α-TPE). Blots were probed with anti-GST antibody to detect GST-RPT2 and phot1<sup>GK</sup>-GST.

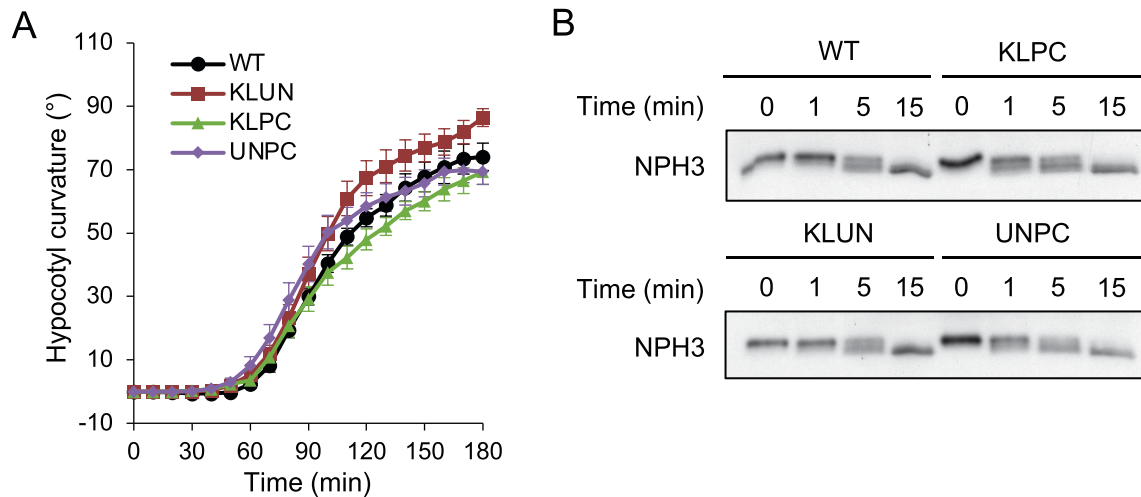

**Fig. S5.** Analysis of quadruple 14-3-3 mutants. (A) Phototropism of etiolated wild-type (WT) seedlings or *kappa lambda phi chi* (KLPC), *kappa lambda upsilon nu* (KLUN) and *upsilon nu phi chi* (UNPC) quadruple mutant seedlings irradiated with  $0.5 \mu\text{mol m}^{-2} \text{s}^{-1}$  unilateral blue light. Hypocotyl curvatures were measured every 10 min for 3 h, and each value is the mean  $\pm$  SE of 10 seedlings. (B) Immunoblot analysis of total protein extracts from etiolated WT or KLPC, KLPC and UNPC quadruple mutant seedlings irradiated with  $15 \mu\text{mol m}^{-2} \text{s}^{-1}$  of blue light for the time indicated. Blots were probed with anti-NPH3 antibodies.
